# Supplementary material
Source: Research Square preprint supplement (doi:10.21203/rs.3.rs-9305286/v1)
Supplement: Supplementary file 1 [file 07eee1a51af09e0421697621.docx]

|  | ABRE | DRE | CRT | ARE | W-box | TC-rich | TCA-element | TGACG-motif | CGTCA-motif | TGA-element | GARE-motif | P-box |
| --- | --- | --- | --- | --- | --- | --- | --- | --- | --- | --- | --- | --- |
| GaPR1-1 | 3 | 1 | 0 | 1 | 1 | 0 | 1 | 0 | 0 | 2 | 0 | 2 |
| GaPR1-2 | 1 | 0 | 0 | 3 | 0 | 1 | 1 | 1 | 1 | 0 | 1 | 0 |
| GaPR1-3 | 1 | 0 | 1 | 1 | 1 | 1 | 0 | 0 | 0 | 1 | 0 | 0 |
| GaPR1-4 | 3 | 2 | 2 | 1 | 0 | 0 | 0 | 1 | 1 | 1 | 1 | 1 |
| GaPR1-5 | 4 | 0 | 0 | 0 | 0 | 3 | 1 | 0 | 2 | 0 | 0 | 1 |
| GaPR1-6 | 0 | 0 | 0 | 1 | 1 | 0 | 0 | 2 | 0 | 0 | 2 | 0 |
| GaPR1-7 | 1 | 3 | 1 | 4 | 0 | 4 | 0 | 0 | 0 | 1 | 1 | 2 |
| GaPR1-8 | 3 | 0 | 3 | 5 | 3 | 0 | 0 | 3 | 2 | 0 | 0 | 0 |
| GaPR1-9 | 4 | 1 | 0 | 1 | 1 | 0 | 1 | 1 | 1 | 1 | 0 | 1 |
| GaPR1-10 | 1 | 0 | 1 | 2 | 0 | 1 | 0 | 0 | 0 | 0 | 0 | 1 |
| GaPR1-11 | 2 | 2 | 0 | 2 | 0 | 0 | 1 | 1 | 1 | 0 | 1 | 1 |
| GaPR1-12 | 1 | 3 | 5 | 2 | 0 | 0 | 0 | 0 | 0 | 2 | 3 | 0 |
| GaPR1-13 | 3 | 0 | 1 | 5 | 1 | 0 | 1 | 1 | 1 | 2 | 0 | 0 |
| GaPR1-14 | 2 | 2 | 0 | 2 | 1 | 1 | 0 | 0 | 0 | 0 | 0 | 0 |
| GbPR1-1 | 2 | 1 | 2 | 4 | 0 | 0 | 1 | 0 | 0 | 1 | 0 | 1 |
| GbPR1-2 | 1 | 0 | 2 | 2 | 2 | 0 | 0 | 1 | 1 | 0 | 1 | 1 |
| GbPR1-3 | 1 | 0 | 1 | 0 | 0 | 1 | 2 | 3 | 3 | 1 | 0 | 1 |
| GbPR1-4 | 0 | 0 | 1 | 3 | 3 | 1 | 0 | 0 | 0 | 0 | 2 | 0 |
| GbPR1-5 | 1 | 1 | 1 | 4 | 1 | 0 | 1 | 1 | 1 | 1 | 1 | 1 |
| GbPR1-6 | 4 | 0 | 4 | 0 | 0 | 0 | 0 | 1 | 1 | 0 | 0 | 0 |
| GbPR1-7 | 0 | 0 | 2 | 3 | 1 | 2 | 0 | 0 | 0 | 2 | 1 | 1 |
| GbPR1-8 | 2 | 0 | 1 | 1 | 1 | 0 | 2 | 1 | 1 | 0 | 0 | 0 |
| GbPR1-9 | 1 | 3 | 2 | 1 | 1 | 3 | 3 | 0 | 0 | 1 | 0 | 0 |
| GbPR1-10 | 1 | 0 | 1 | 2 | 0 | 0 | 0 | 1 | 1 | 0 | 1 | 1 |
| GbPR1-11 | 0 | 0 | 1 | 2 | 0 | 0 | 2 | 0 | 0 | 0 | 0 | 0 |
| GbPR1-12 | 5 | 0 | 1 | 2 | 1 | 1 | 0 | 0 | 0 | 1 | 0 | 0 |
| GbPR1-13 | 2 | 2 | 2 | 3 | 0 | 0 | 1 | 0 | 0 | 0 | 1 | 1 |
| GbPR1-14 | 0 | 0 | 3 | 0 | 2 | 0 | 0 | 0 | 0 | 0 | 0 | 1 |
| GbPR1-15 | 1 | 1 | 1 | 0 | 0 | 1 | 2 | 0 | 0 | 2 | 1 | 0 |
| GbPR1-16 | 0 | 0 | 1 | 4 | 0 | 0 | 0 | 0 | 0 | 0 | 0 | 2 |
| GbPR1-17 | 0 | 1 | 1 | 7 | 1 | 1 | 1 | 2 | 2 | 2 | 0 | 0 |
| GbPR1-18 | 1 | 0 | 0 | 3 | 0 | 0 | 0 | 0 | 0 | 0 | 0 | 2 |
| GbPR1-19 | 2 | 1 | 1 | 1 | 0 | 0 | 2 | 1 | 1 | 1 | 2 | 1 |
| GbPR1-20 | 0 | 0 | 2 | 5 | 0 | 1 | 0 | 0 | 0 | 0 | 0 | 0 |
| GbPR1-21 | 1 | 1 | 0 | 0 | 1 | 0 | 0 | 1 | 1 | 2 | 2 | 0 |
| GbPR1-22 | 2 | 0 | 1 | 0 | 1 | 0 | 1 | 2 | 2 | 0 | 1 | 0 |
| GhPR1-1 | 0 | 2 | 5 | 1 | 0 | 1 | 2 | 1 | 1 | 2 | 1 | 2 |
| GhPR1-2 | 2 | 0 | 2 | 1 | 1 | 0 | 0 | 0 | 0 | 0 | 0 | 0 |
| GhPR1-3 | 0 | 1 | 3 | 3 | 1 | 0 | 2 | 0 | 0 | 0 | 1 | 1 |
| GhPR1-4 | 1 | 3 | 2 | 2 | 1 | 3 | 1 | 1 | 1 | 1 | 0 | 0 |
| GhPR1-5 | 1 | 0 | 3 | 3 | 0 | 0 | 0 | 1 | 1 | 0 | 0 | 1 |
| GhPR1-6 | 0 | 2 | 4 | 2 | 2 | 2 | 2 | 0 | 0 | 0 | 0 | 0 |
| GhPR1-7 | 1 | 0 | 1 | 1 | 0 | 0 | 0 | 0 | 0 | 1 | 2 | 0 |
| GhPR1-8 | 1 | 1 | 4 | 4 | 1 | 2 | 1 | 1 | 1 | 1 | 0 | 1 |
| GhPR1-9 | 0 | 0 | 2 | 2 | 0 | 1 | 1 | 0 | 0 | 0 | 0 | 1 |
| GhPR1-10 | 2 | 0 | 4 | 2 | 0 | 0 | 0 | 1 | 1 | 2 | 0 | 1 |
| GhPR1-11 | 4 | 2 | 6 | 0 | 0 | 2 | 0 | 1 | 1 | 0 | 0 | 0 |
| GhPR1-12 | 0 | 0 | 3 | 3 | 1 | 0 | 0 | 0 | 0 | 2 | 2 | 0 |
| GhPR1-13 | 7 | 0 | 4 | 1 | 0 | 1 | 1 | 3 | 3 | 0 | 1 | 2 |
| GhPR1-14 | 1 | 3 | 5 | 2 | 0 | 0 | 0 | 1 | 1 | 0 | 0 | 0 |
| GhPR1-15 | 1 | 2 | 2 | 1 | 1 | 0 | 1 | 0 | 2 | 1 | 0 | 0 |
| GhPR1-16 | 0 | 3 | 3 | 2 | 0 | 3 | 2 | 1 | 0 | 0 | 2 | 2 |
| GhPR1-17 | 0 | 0 | 3 | 2 | 1 | 1 | 0 | 0 | 0 | 0 | 0 | 0 |
| GhPR1-18 | 2 | 3 | 11 | 3 | 1 | 0 | 1 | 1 | 3 | 2 | 1 | 1 |
| GhPR1-19 | 0 | 0 | 3 | 0 | 2 | 0 | 1 | 2 | 0 | 0 | 0 | 1 |
| GhPR1-20 | 1 | 0 | 1 | 0 | 0 | 1 | 0 | 0 | 0 | 2 | 0 | 0 |
| GhPR1-21 | 0 | 0 | 6 | 1 | 0 | 0 | 0 | 1 | 0 | 0 | 1 | 0 |
| GhPR1-22 | 1 | 1 | 4 | 4 | 1 | 2 | 1 | 1 | 1 | 1 | 0 | 0 |
| GhPR1-23 | 0 | 0 | 2 | 2 | 1 | 0 | 0 | 0 | 0 | 0 | 0 | 1 |
| GhPR1-24 | 2 | 0 | 3 | 1 | 1 | 0 | 2 | 1 | 1 | 0 | 1 | 1 |
| GhPR1-25 | 5 | 0 | 3 | 0 | 0 | 0 | 2 | 0 | 0 | 3 | 0 | 0 |
| GhPR1-26 | 1 | 2 | 4 | 5 | 0 | 1 | 0 | 0 | 0 | 0 | 0 | 1 |
| GhPR1-27 | 2 | 1 | 7 | 0 | 1 | 0 | 0 | 2 | 2 | 0 | 1 | 0 |
| GhPR1-28 | 1 | 1 | 3 | 1 | 0 | 2 | 1 | 0 | 0 | 2 | 2 | 2 |
| GrPR1-1 | 2 | 3 | 6 | 1 | 1 | 2 | 1 | 1 | 1 | 3 | 1 | 2 |
| GrPR1-2 | 0 | 0 | 5 | 1 | 0 | 0 | 1 | 1 | 1 | 1 | 0 | 1 |
| GrPR1-3 | 1 | 0 | 1 | 0 | 1 | 2 | 0 | 0 | 0 | 0 | 1 | 2 |
| GrPR1-4 | 0 | 1 | 4 | 1 | 1 | 3 | 0 | 0 | 2 | 1 | 0 | 0 |
| GrPR1-5 | 0 | 2 | 5 | 2 | 0 | 0 | 0 | 2 | 0 | 0 | 2 | 2 |
| GrPR1-6 | 1 | 0 | 2 | 0 | 1 | 1 | 1 | 1 | 1 | 2 | 0 | 0 |
| GrPR1-7 | 0 | 1 | 1 | 0 | 0 | 0 | 0 | 0 | 0 | 0 | 2 | 0 |
| GrPR1-8 | 3 | 0 | 4 | 6 | 1 | 1 | 3 | 3 | 3 | 2 | 0 | 0 |
| GrPR1-9 | 1 | 2 | 0 | 3 | 1 | 1 | 1 | 1 | 1 | 0 | 2 | 1 |
| GrPR1-10 | 0 | 0 | 0 | 2 | 0 | 0 | 0 | 0 | 2 | 1 | 0 | 1 |
| GrPR1-11 | 2 | 0 | 2 | 1 | 2 | 0 | 1 | 2 | 0 | 0 | 1 | 1 |
| GrPR1-12 | 5 | 0 | 3 | 1 | 0 | 0 | 1 | 0 | 2 | 1 | 0 | 0 |
| GrPR1-13 | 0 | 1 | 1 | 3 | 1 | 1 | 0 | 0 | 0 | 0 | 1 | 0 |
| GrPR1-14 | 1 | 0 | 1 | 2 | 1 | 0 | 2 | 2 | 2 | 2 | 0 | 0 |
| GrPR1-15 | 2 | 0 | 3 | 3 | 0 | 0 | 0 | 0 | 0 | 0 | 2 | 1 |
| GrPR1-16 | 0 | 1 | 5 | 0 | 2 | 0 | 3 | 2 | 0 | 0 | 0 | 1 |
| GrPR1-17 | 2 | 0 | 1 | 2 | 1 | 1 | 0 | 0 | 0 | 2 | 2 | 0 |
| GrPR1-18 | 0 | 2 | 3 | 0 | 1 | 0 | 4 | 4 | 4 | 3 | 2 | 2 |

|  | TATC-box | ERE | G-box | Box-4 | I-Box | sp1 | GT1-motif | CAT-box | AACA-motif | GCN4-motif | O2-site |
| --- | --- | --- | --- | --- | --- | --- | --- | --- | --- | --- | --- |
| GaPR1-1 | 1 | 1 | 1 | 1 | 1 | 1 | 1 | 1 | 0 | 1 | 2 |
| GaPR1-2 | 0 | 3 | 6 | 6 | 0 | 0 | 3 | 0 | 2 | 0 | 0 |
| GaPR1-3 | 0 | 1 | 1 | 1 | 0 | 0 | 1 | 2 | 0 | 3 | 0 |
| GaPR1-4 | 3 | 1 | 3 | 3 | 1 | 1 | 8 | 0 | 1 | 0 | 1 |
| GaPR1-5 | 2 | 0 | 2 | 2 | 0 | 2 | 2 | 3 | 0 | 1 | 0 |
| GaPR1-6 | 0 | 1 | 1 | 1 | 0 | 0 | 3 | 0 | 2 | 1 | 0 |
| GaPR1-7 | 2 | 4 | 4 | 4 | 2 | 0 | 0 | 1 | 0 | 1 | 1 |
| GaPR1-8 | 0 | 5 | 8 | 8 | 0 | 1 | 1 | 0 | 1 | 0 | 0 |
| GaPR1-9 | 5 | 1 | 2 | 2 | 1 | 0 | 2 | 0 | 0 | 3 | 1 |
| GaPR1-10 | 0 | 2 | 3 | 3 | 1 | 0 | 0 | 1 | 0 | 0 | 0 |
| GaPR1-11 | 1 | 2 | 6 | 6 | 0 | 1 | 2 | 0 | 1 | 0 | 1 |
| GaPR1-12 | 0 | 2 | 1 | 1 | 0 | 0 | 1 | 1 | 2 | 3 | 1 |
| GaPR1-13 | 1 | 5 | 2 | 2 | 1 | 0 | 2 | 2 | 0 | 0 | 1 |
| GaPR1-14 | 0 | 2 | 4 | 4 | 0 | 1 | 2 | 1 | 0 | 0 | 0 |
| GbPR1-1 | 0 | 0 | 3 | 2 | 0 | 1 | 2 | 0 | 1 | 2 | 0 |
| GbPR1-2 | 1 | 1 | 1 | 3 | 1 | 0 | 8 | 1 | 1 | 0 | 1 |
| GbPR1-3 | 0 | 2 | 2 | 4 | 0 | 2 | 0 | 2 | 0 | 1 | 0 |
| GbPR1-4 | 0 | 6 | 0 | 8 | 0 | 0 | 1 | 0 | 1 | 0 | 1 |
| GbPR1-5 | 2 | 1 | 1 | 2 | 1 | 0 | 1 | 0 | 0 | 2 | 0 |
| GbPR1-6 | 2 | 2 | 4 | 1 | 0 | 0 | 1 | 1 | 2 | 0 | 1 |
| GbPR1-7 | 0 | 5 | 0 | 4 | 1 | 1 | 2 | 1 | 0 | 0 | 0 |
| GbPR1-8 | 3 | 3 | 3 | 1 | 0 | 0 | 2 | 0 | 3 | 1 | 1 |
| GbPR1-9 | 0 | 2 | 1 | 2 | 1 | 4 | 2 | 1 | 0 | 0 | 0 |
| GbPR1-10 | 1 | 1 | 2 | 5 | 0 | 3 | 2 | 0 | 0 | 3 | 1 |
| GbPR1-11 | 0 | 3 | 0 | 1 | 0 | 0 | 2 | 2 | 3 | 0 | 0 |
| GbPR1-12 | 1 | 2 | 1 | 4 | 2 | 2 | 3 | 2 | 0 | 0 | 0 |
| GbPR1-13 | 0 | 0 | 3 | 1 | 0 | 0 | 3 | 0 | 4 | 0 | 0 |
| GbPR1-14 | 1 | 1 | 1 | 3 | 0 | 1 | 4 | 0 | 0 | 2 | 1 |
| GbPR1-15 | 1 | 3 | 1 | 4 | 0 | 0 | 0 | 2 | 0 | 0 | 1 |
| GbPR1-16 | 0 | 5 | 0 | 8 | 1 | 1 | 2 | 3 | 1 | 3 | 0 |
| GbPR1-17 | 3 | 1 | 0 | 2 | 3 | 0 | 2 | 0 | 0 | 0 | 0 |
| GbPR1-18 | 0 | 0 | 1 | 4 | 0 | 0 | 2 | 1 | 3 | 1 | 1 |
| GbPR1-19 | 1 | 1 | 1 | 3 | 1 | 1 | 3 | 0 | 1 | 0 | 1 |
| GbPR1-20 | 0 | 5 | 0 | 4 | 0 | 1 | 1 | 1 | 3 | 1 | 0 |
| GbPR1-21 | 0 | 1 | 1 | 2 | 1 | 0 | 0 | 0 | 0 | 0 | 1 |
| GbPR1-22 | 1 | 1 | 3 | 3 | 2 | 0 | 0 | 1 | 0 | 0 | 4 |
| GhPR1-1 | 1 | 3 | 1 | 6 | 1 | 1 | 3 | 1 | 2 | 1 | 2 |
| GhPR1-2 | 2 | 1 | 3 | 2 | 0 | 0 | 3 | 0 | 2 | 0 | 0 |
| GhPR1-3 | 0 | 3 | 0 | 3 | 2 | 0 | 4 | 2 | 1 | 2 | 1 |
| GhPR1-4 | 3 | 2 | 1 | 4 | 0 | 1 | 1 | 0 | 2 | 0 | 0 |
| GhPR1-5 | 0 | 1 | 1 | 3 | 1 | 0 | 8 | 1 | 0 | 2 | 1 |
| GhPR1-6 | 4 | 7 | 0 | 9 | 0 | 0 | 1 | 0 | 0 | 0 | 0 |
| GhPR1-7 | 0 | 4 | 1 | 3 | 0 | 0 | 0 | 1 | 2 | 1 | 1 |
| GhPR1-8 | 0 | 1 | 1 | 2 | 1 | 1 | 1 | 0 | 3 | 0 | 0 |
| GhPR1-9 | 3 | 2 | 0 | 3 | 1 | 0 | 0 | 1 | 1 | 0 | 2 |
| GhPR1-10 | 1 | 2 | 1 | 5 | 0 | 1 | 2 | 0 | 1 | 3 | 0 |
| GhPR1-11 | 0 | 2 | 4 | 1 | 0 | 0 | 1 | 1 | 0 | 2 | 1 |
| GhPR1-12 | 0 | 5 | 0 | 4 | 0 | 1 | 2 | 1 | 1 | 0 | 0 |
| GhPR1-13 | 4 | 0 | 6 | 0 | 1 | 0 | 0 | 0 | 2 | 3 | 1 |
| GhPR1-14 | 0 | 1 | 2 | 5 | 0 | 0 | 3 | 0 | 2 | 1 | 0 |
| GhPR1-15 | 0 | 2 | 1 | 2 | 0 | 0 | 3 | 1 | 2 | 2 | 0 |
| GhPR1-16 | 0 | 4 | 0 | 1 | 0 | 1 | 1 | 0 | 2 | 1 | 0 |
| GhPR1-17 | 1 | 1 | 0 | 4 | 2 | 0 | 6 | 2 | 0 | 0 | 1 |
| GhPR1-18 | 0 | 0 | 3 | 1 | 0 | 0 | 3 | 2 | 1 | 0 | 0 |
| GhPR1-19 | 2 | 1 | 1 | 3 | 0 | 1 | 4 | 0 | 1 | 2 | 1 |
| GhPR1-20 | 0 | 3 | 1 | 4 | 0 | 0 | 0 | 2 | 1 | 0 | 1 |
| GhPR1-21 | 0 | 5 | 0 | 8 | 1 | 1 | 2 | 0 | 0 | 2 | 0 |
| GhPR1-22 | 3 | 1 | 0 | 2 | 1 | 0 | 2 | 2 | 3 | 0 | 2 |
| GhPR1-23 | 0 | 0 | 0 | 4 | 0 | 0 | 1 | 2 | 1 | 1 | 0 |
| GhPR1-24 | 1 | 1 | 1 | 3 | 1 | 1 | 2 | 0 | 2 | 0 | 1 |
| GhPR1-25 | 0 | 3 | 4 | 1 | 0 | 0 | 1 | 1 | 0 | 0 | 0 |
| GhPR1-26 | 0 | 4 | 1 | 3 | 0 | 1 | 1 | 0 | 1 | 1 | 0 |
| GhPR1-27 | 1 | 1 | 3 | 3 | 2 | 0 | 0 | 1 | 1 | 0 | 4 |
| GhPR1-28 | 2 | 3 | 1 | 5 | 1 | 0 | 2 | 2 | 1 | 0 | 0 |
| GrPR1-1 | 2 | 2 | 3 | 1 | 1 | 1 | 1 | 1 | 0 | 1 | 1 |
| GrPR1-2 | 0 | 1 | 1 | 6 | 0 | 1 | 3 | 0 | 1 | 0 | 0 |
| GrPR1-3 | 1 | 6 | 1 | 3 | 1 | 1 | 1 | 2 | 0 | 1 | 3 |
| GrPR1-4 | 1 | 2 | 0 | 2 | 0 | 1 | 3 | 0 | 3 | 0 | 2 |
| GrPR1-5 | 2 | 4 | 0 | 1 | 0 | 0 | 2 | 0 | 1 | 2 | 0 |
| GrPR1-6 | 1 | 4 | 1 | 4 | 1 | 1 | 0 | 2 | 0 | 0 | 0 |
| GrPR1-7 | 0 | 4 | 0 | 9 | 1 | 0 | 2 | 0 | 2 | 2 | 3 |
| GrPR1-8 | 2 | 2 | 3 | 3 | 3 | 1 | 3 | 1 | 0 | 0 | 0 |
| GrPR1-9 | 0 | 0 | 1 | 4 | 0 | 0 | 4 | 0 | 3 | 1 | 1 |
| GrPR1-10 | 0 | 1 | 0 | 4 | 0 | 0 | 1 | 2 | 0 | 1 | 0 |
| GrPR1-11 | 1 | 1 | 1 | 3 | 1 | 1 | 2 | 0 | 0 | 0 | 1 |
| GrPR1-12 | 0 | 3 | 4 | 1 | 0 | 0 | 0 | 1 | 3 | 0 | 0 |
| GrPR1-13 | 0 | 3 | 0 | 3 | 0 | 1 | 1 | 0 | 0 | 1 | 2 |
| GrPR1-14 | 2 | 4 | 1 | 3 | 0 | 1 | 0 | 2 | 4 | 0 | 2 |
| GrPR1-15 | 0 | 0 | 3 | 1 | 1 | 0 | 3 | 1 | 0 | 0 | 0 |
| GrPR1-16 | 1 | 1 | 1 | 3 | 0 | 1 | 4 | 0 | 0 | 2 | 1 |
| GrPR1-17 | 1 | 2 | 2 | 4 | 2 | 0 | 4 | 2 | 1 | 0 | 1 |
| GrPR1-18 | 0 | 0 | 0 | 3 | 2 | 0 | 2 | 2 | 0 | 2 | 0 |
