# Supplementary material
Source: Research Square preprint supplement (doi:10.21203/rs.3.rs-9305286/v1)
Supplement: Supplementary file 2 [file 1499614e47efad3fc6d51fc4.docx]

| **Arabidopsis thaliana** | |
| --- | --- |
| AT2G19990.1 | AtPR1-1 |
| AT2G14610.1 | AtPR1-2 |
| AT2G19970.1 | AtPR1-3 |
| AT2G19980.1 | AtPR1-4 |
| AT4G07820.1 | AtPR1-5 |
| AT5G66590.1 | AtPR1-6 |
| AT5G02730.1 | AtPR1-7 |
| AT1G01310.1 | AtPR1-8 |
| AT1G50060.1 | AtPR1-9 |
| AT3G19690.1 | AtPR1-10 |
| AT5G26130.1 | AtPR1-11 |
| AT3G09590.1 | AtPR1-12 |
| AT1G02180.1 | AtPR1-13 |
| AT4G30320.1 | AtPR1-14 |
| AT4G33730.1 | AtPR1-15 |
| AT4G25780.1 | AtPR1-16 |
| AT4G33720.1 | AtPR1-17 |
| AT4G31470.1 | AtPR1-18 |
| AT2G14580.1 | AtPR1-19 |
| AT5G57625.1 | AtPR1-20 |
| AT1G50050.1 | AtPR1-21 |
| AT4G25790.1 | AtPR1-22 |
| AT4G33710.1 | AtPR1-23 |

| **Gossypium Arboreum** | |
| --- | --- |
| Ga02G0199 | GaPR1-1 |
| Ga02G1268 | GaPR1-2 |
| Ga02G1269 | GaPR1-3 |
| Ga04G2053 | GaPR1-4 |
| Ga05G0680 | GaPR1-5 |
| Ga06G1240 | GaPR1-6 |
| Ga08G1497 | GaPR1-7 |
| Ga08G2102 | GaPR1-8 |
| Ga08G1005 | GaPR1-9 |
| Ga08G1006 | GaPR1-10 |
| Ga09G1168 | GaPR1-11 |
| Ga11G2004 | GaPR1-12 |
| Ga13G0469 | GaPR1-13 |
| Ga14G1633 | GaPR1-14 |

| **Gossypium Barbadense** | |
| --- | --- |
| AA21734.1 | GbPR1-1 |
| AA21803.1 | GbPR1-2 |
| AA18722.1 | GbPR1-3 |
| AA18721.1 | GbPR1-4 |
| AA14380.1 | GbPR1-5 |
| AA18172.1 | GbPR1-6 |
| AA21859.1 | GbPR1-7 |
| DD06233.1 | GbPR1-8 |
| DD28103.1 | GbPR1-9 |
| DD28105.1 | GbPR1-10 |
| DD33784.1 | GbPR1-11 |
| DD04431.1 | GbPR1-12 |
| DD27623.1 | GbPR1-13 |
| DD01273.1 | GbPR1-14 |
| DD18667.1 | GbPR1-15 |
| DD22245.1 | GbPR1-16 |
| DD01131.1 | GbPR1-17 |
| DD12190.1 | GbPR1-18 |
| DD19955.1 | GbPR1-19 |
| DD32854.1 | GbPR1-20 |
| DD32855.1 | GbPR1-21 |
| DD24721.1 | GbPR1-22 |

| **Gossypium Hirsutum** | |
| --- | --- |
| A01G202400.1 | GhPR1-1 |
| A01G202700.1 | GhPR1-2 |
| A02G192400.1 | GhPR1-3 |
| A04G139700.1 | GhPR1-4 |
| A05G414300.1 | GhPR1-5 |
| A08G099600.1 | GhPR1-6 |
| A08G099700.1 | GhPR1-7 |
| A08G145900.1 | GhPR1-8 |
| A08G204000.1 | GhPR1-9 |
| A09G118600.1 | GhPR1-10 |
| A11G198400.1 | GhPR1-11 |
| A12G031500.1 | GhPR1-12 |
| A13G049600.1 | GhPR1-13 |
| D01G200100.1 | GhPR1-14 |
| D01G200200.1 | GhPR1-15 |
| D03G018400.1 | GhPR1-16 |
| D04G007500.1 | GhPR1-17 |
| D05G066600.1 | GhPR1-18 |
| D06G119200.1 | GhPR1-19 |
| D08G091700.1 | GhPR1-20 |
| D08G091800.1 | GhPR1-21 |
| D08G144900.1 | GhPR1-22 |
| D08G199500.1 | GhPR1-23 |
| D09G111500.1 | GhPR1-24 |
| D11G201700.1 | GhPR1-25 |
| D12G042600.1 | GhPR1-26 |
| D13G052200.1 | GhPR1-27 |
| D13G052300.1 | GhPR1-28 |

| **Gossypium Raimondii** | |
| --- | --- |
| 002G155300.v2.1 | GrPR1-1 |
| 002G212700.v2.1 | GrPR1-2 |
| 002G212800.v2.1 | GrPR1-3 |
| 002G212900.v2.1 | GrPR1-4 |
| 003G019000.v2.1 | GrPR1-5 |
| 004G101200.v2.1 | GrPR1-6 |
| 004G101300.v2.1 | GrPR1-7 |
| 004G151700.v2.1 | GrPR1-8 |
| 004G207800.v2.1 | GrPR1-9 |
| 004G207900.v2.1 | GrPR1-10 |
| 006G115900.v2.1 | GrPR1-11 |
| 007G207500.v2.1 | GrPR1-12 |
| 008G043500.v2.1 | GrPR1-13 |
| 008G044000.v2.1 | GrPR1-14 |
| 009G067300.v2.1 | GrPR1-15 |
| 010G122500.v2.1 | GrPR1-16 |
| 012G009600.v2.1 | GrPR1-17 |
| 013G054100.v2.1 | GrPR1-18 |
|  |  |
