# Supplementary material
Source: Research Square preprint supplement (doi:10.21203/rs.3.rs-9305286/v1)
Supplement: Supplementary file 3 [file 802cfbbbd382052a3fc8c589.docx]

|  | **NemX_ctl1** | **NemX_ctl2** | **NemX_ctl3** | **NemX_Ctl avg** | **NemX_rkn1** | **NemX_rkn2** | **NemX_rkn3** | **NemX_rkn avg** |
| --- | --- | --- | --- | --- | --- | --- | --- | --- |
| **GhPR1-1** | 1.016 | 1.403 | 0.966 | 1.128 | 0.989 | 0.741 | 0.747 | 0.826 |
| **GhPR1-2** | 60.521 | 64.498 | 66.918 | 63.979 | 72.158 | 72.287 | 58.648 | 67.698 |
| **GhPR1-3** | 28.521 | 22.540 | 21.871 | 24.310 | 22.492 | 20.910 | 22.325 | 21.909 |
| **GhPR1-4** | 3.645 | 3.762 | 2.288 | 3.232 | 2.974 | 3.302 | 4.386 | 3.554 |
| **GhPR1-5** | 45.413 | 43.284 | 45.472 | 44.723 | 47.910 | 51.993 | 41.099 | 47.001 |
| **GhPR1-6** | 0.259 | 0.256 | 0.307 | 0.274 | 0.630 | 0.000 | 0.253 | 0.294 |
| **GhPR1-7** | 5.666 | 7.212 | 9.649 | 7.509 | 5.532 | 6.118 | 5.087 | 5.579 |
| **GhPR1-8** | 15.712 | 17.002 | 19.728 | 17.481 | 13.662 | 16.429 | 13.928 | 14.673 |
| **GhPR1-9** | 2.468 | 1.374 | 2.161 | 2.001 | 1.134 | 1.414 | 1.332 | 1.294 |
| **GhPR1-10** | 6.131 | 6.941 | 6.084 | 6.385 | 9.062 | 10.808 | 8.806 | 9.559 |
| **GhPR1-11** | 3.451 | 2.518 | 3.719 | 3.229 | 2.104 | 3.966 | 4.308 | 3.459 |
| **GhPR1-12** | 1.854 | 0.663 | 1.362 | 1.293 | 2.220 | 2.477 | 1.002 | 1.900 |
| **GhPR1-13** | 29.551 | 22.033 | 22.487 | 24.691 | 32.522 | 26.518 | 28.349 | 29.130 |
| **GhPR1-14** | 18.102 | 10.838 | 22.904 | 17.281 | 19.380 | 18.598 | 15.745 | 17.907 |
| **GhPR1-15** | 5.991 | 6.366 | 5.989 | 6.115 | 8.687 | 7.807 | 6.504 | 7.666 |
| **GhPR1-16** | 0.844 | 2.022 | 0.757 | 1.208 | 1.087 | 0.850 | 0.278 | 0.738 |
| **GhPR1-17** | 5.975 | 6.365 | 7.329 | 6.556 | 4.548 | 3.786 | 3.846 | 4.060 |
| **GhPR1-18** | 2.069 | 1.686 | 6.460 | 3.405 | 3.555 | 1.998 | 3.923 | 3.159 |
| **GhPR1-19** | 5.619 | 4.968 | 5.510 | 5.366 | 4.397 | 5.072 | 5.446 | 4.972 |
| **GhPR1-20** | 4.523 | 2.402 | 6.618 | 4.514 | 4.420 | 3.541 | 2.530 | 3.497 |
| **GhPR1-21** | 30.748 | 36.506 | 36.195 | 34.483 | 36.591 | 24.195 | 36.774 | 32.520 |
| **GhPR1-22** | 3.913 | 5.753 | 8.503 | 6.057 | 4.363 | 5.093 | 4.575 | 4.677 |
| **GhPR1-23** | 2.996 | 4.124 | 2.659 | 3.259 | 2.559 | 3.396 | 1.721 | 2.559 |
| **GhPR1-24** | 19.579 | 21.708 | 20.524 | 20.604 | 22.503 | 24.357 | 19.951 | 22.270 |
| **GhPR1-25** | 83.185 | 64.933 | 88.730 | 78.949 | 90.699 | 93.249 | 66.549 | 83.499 |
| **GhPR1-26** | 2.849 | 7.065 | 7.464 | 5.793 | 9.556 | 4.661 | 6.142 | 6.786 |
| **GhPR1-27** | 2.319 | 0.715 | 3.924 | 2.319 | 0.833 | 1.047 | 1.907 | 1.262 |
| **GhPR1-28** | 0.998 | 0.000 | 0.973 | 0.657 | 1.163 | 0.971 | 0.000 | 0.711 |

|  | **SJ2_ctl1** | **SJ2_ctl2** | **SJ2_ctl3** | **SJ2_ctl avg** | **SJ2_rkn1** | **SJ2_rkn2** | **SJ2_rkn3** | **SJ2_rkn avg** |
| --- | --- | --- | --- | --- | --- | --- | --- | --- |
| **GhPR1-1** | 4.214 | 2.717 | 5.009 | 3.980 | 3.714 | 3.771 | 3.521 | 3.669 |
| **GhPR1-2** | 61.674 | 64.066 | 61.903 | 62.548 | 62.892 | 64.343 | 69.510 | 65.582 |
| **GhPR1-3** | 25.841 | 21.132 | 18.948 | 21.974 | 18.914 | 16.327 | 15.015 | 16.752 |
| **GhPR1-4** | 2.741 | 3.142 | 2.103 | 2.662 | 3.051 | 4.322 | 2.797 | 3.390 |
| **GhPR1-5** | 48.701 | 43.274 | 39.171 | 43.715 | 41.921 | 41.611 | 42.681 | 42.071 |
| **GhPR1-6** | 0.938 | 0.552 | 0.624 | 0.705 | 0.383 | 0.357 | 0.542 | 0.427 |
| **GhPR1-7** | 10.683 | 8.218 | 15.099 | 11.333 | 12.188 | 18.934 | 9.297 | 13.473 |
| **GhPR1-8** | 16.282 | 15.055 | 16.000 | 15.779 | 11.119 | 7.545 | 13.178 | 10.614 |
| **GhPR1-9** | 0.479 | 0.973 | 1.726 | 1.059 | 0.263 | 1.887 | 0.757 | 0.969 |
| **GhPR1-10** | 6.809 | 7.632 | 5.426 | 6.623 | 13.050 | 8.828 | 9.184 | 10.354 |
| **GhPR1-11** | 6.879 | 6.165 | 6.385 | 6.477 | 4.359 | 3.248 | 4.340 | 3.982 |
| **GhPR1-12** | 2.264 | 3.685 | 3.159 | 3.036 | 1.701 | 0.624 | 1.555 | 1.293 |
| **GhPR1-13** | 39.074 | 31.097 | 38.359 | 36.177 | 27.484 | 32.218 | 29.221 | 29.641 |
| **GhPR1-14** | 18.947 | 20.475 | 23.409 | 20.944 | 15.038 | 23.245 | 21.294 | 19.859 |
| **GhPR1-15** | 10.043 | 6.620 | 9.338 | 8.667 | 7.712 | 6.098 | 7.587 | 7.132 |
| **GhPR1-16** | 2.261 | 1.178 | 1.593 | 1.677 | 1.162 | 1.089 | 1.280 | 1.177 |
| **GhPR1-17** | 8.248 | 7.370 | 8.665 | 8.094 | 2.146 | 1.729 | 4.080 | 2.652 |
| **GhPR1-18** | 3.025 | 2.209 | 2.390 | 2.542 | 2.339 | 2.658 | 3.072 | 2.690 |
| **GhPR1-19** | 3.888 | 3.302 | 4.845 | 4.012 | 4.803 | 9.556 | 3.994 | 6.118 |
| **GhPR1-20** | 4.385 | 3.132 | 5.251 | 4.256 | 2.871 | 4.644 | 4.234 | 3.916 |
| **GhPR1-21** | 58.779 | 80.560 | 104.910 | 81.417 | 21.488 | 25.137 | 24.020 | 23.548 |
| **GhPR1-22** | 1.848 | 2.502 | 2.790 | 2.380 | 2.511 | 3.144 | 2.998 | 2.885 |
| **GhPR1-23** | 2.970 | 3.754 | 4.394 | 3.706 | 1.813 | 1.992 | 3.529 | 2.445 |
| **GhPR1-24** | 23.328 | 20.028 | 26.469 | 23.275 | 16.949 | 13.434 | 19.295 | 16.559 |
| **GhPR1-25** | 76.535 | 73.997 | 77.498 | 76.010 | 94.417 | 109.168 | 97.915 | 100.500 |
| **GhPR1-26** | 4.381 | 11.754 | 14.163 | 10.099 | 4.256 | 4.785 | 8.536 | 5.859 |
| **GhPR1-27** | 3.049 | 3.186 | 4.875 | 3.703 | 3.611 | 2.116 | 8.626 | 4.784 |
| **GhPR1-28** | 0.593 | 0.535 | 0.400 | 0.509 | 1.819 | 3.344 | 1.832 | 2.332 |

|  | **WMJJ_ctl1** | **WMJJ_ctl2** | **WMJJ_ctl3** | **WMJJ_ctl avg** | **WMJJ_rkn1** | **WMJJ_rkn2** | **WMJJ_rkn3** | **WMJJ_rkn avg** |
| --- | --- | --- | --- | --- | --- | --- | --- | --- |
| **GhPR1-1** | 1.263 | 1.708 | 2.731 | 1.901 | 1.942 | 3.208 | 4.978 | 3.376 |
| **GhPR1-2** | 68.210 | 71.537 | 82.044 | 73.930 | 72.801 | 70.216 | 79.496 | 74.171 |
| **GhPR1-3** | 29.498 | 25.268 | 21.175 | 25.314 | 17.822 | 23.381 | 14.080 | 18.428 |
| **GhPR1-4** | 4.221 | 1.308 | 1.375 | 2.301 | 3.114 | 5.465 | 2.549 | 3.709 |
| **GhPR1-5** | 47.537 | 52.352 | 42.341 | 47.410 | 41.472 | 45.165 | 40.381 | 42.339 |
| **GhPR1-6** | 0.323 | 0.652 | 0.308 | 0.427 | 1.106 | 0.272 | 0.702 | 0.694 |
| **GhPR1-7** | 10.751 | 13.686 | 14.117 | 12.852 | 23.547 | 19.691 | 21.894 | 21.711 |
| **GhPR1-8** | 16.367 | 12.710 | 14.895 | 14.657 | 8.211 | 10.885 | 10.115 | 9.737 |
| **GhPR1-9** | 1.490 | 1.093 | 1.422 | 1.335 | 4.080 | 2.244 | 2.896 | 3.073 |
| **GhPR1-10** | 9.561 | 8.668 | 7.856 | 8.695 | 10.331 | 17.937 | 11.703 | 13.324 |
| **GhPR1-11** | 8.012 | 4.844 | 4.337 | 5.731 | 4.916 | 4.714 | 5.337 | 4.989 |
| **GhPR1-12** | 3.051 | 1.097 | 0.957 | 1.702 | 1.668 | 3.740 | 1.389 | 2.265 |
| **GhPR1-13** | 26.397 | 21.310 | 28.785 | 25.497 | 22.547 | 26.360 | 29.909 | 26.272 |
| **GhPR1-14** | 15.952 | 21.054 | 26.814 | 21.273 | 19.614 | 16.609 | 25.565 | 20.596 |
| **GhPR1-15** | 7.766 | 7.967 | 6.958 | 7.564 | 8.596 | 7.237 | 5.979 | 7.270 |
| **GhPR1-16** | 1.304 | 1.969 | 0.758 | 1.344 | 1.788 | 0.548 | 1.026 | 1.121 |
| **GhPR1-17** | 7.159 | 5.721 | 9.012 | 7.298 | 2.425 | 2.712 | 3.785 | 2.974 |
| **GhPR1-18** | 3.509 | 4.429 | 1.918 | 3.285 | 2.743 | 3.507 | 2.543 | 2.931 |
| **GhPR1-19** | 3.568 | 3.049 | 5.057 | 3.891 | 7.062 | 5.184 | 4.556 | 5.601 |
| **GhPR1-20** | 5.646 | 5.216 | 6.315 | 5.725 | 5.975 | 2.995 | 7.396 | 5.456 |
| **GhPR1-21** | 54.200 | 39.632 | 48.783 | 47.539 | 24.211 | 23.461 | 23.872 | 23.848 |
| **GhPR1-22** | 2.278 | 3.058 | 6.388 | 3.908 | 4.683 | 3.011 | 5.231 | 4.308 |
| **GhPR1-23** | 0.620 | 0.211 | 0.332 | 0.388 | 0.635 | 0.791 | 0.615 | 0.680 |
| **GhPR1-24** | 21.146 | 24.935 | 22.918 | 23.000 | 20.094 | 16.743 | 14.817 | 17.218 |
| **GhPR1-25** | 72.323 | 58.782 | 56.069 | 62.391 | 70.254 | 81.333 | 60.990 | 70.859 |
| **GhPR1-26** | 2.823 | 5.832 | 6.515 | 5.057 | 9.564 | 12.484 | 2.491 | 8.180 |
| **GhPR1-27** | 6.196 | 15.477 | 35.906 | 19.193 | 11.218 | 5.336 | 38.826 | 18.460 |
| **GhPR1-28** | 0.000 | 0.635 | 0.809 | 0.482 | 0.212 | 0.282 | 0.597 | 0.364 |
|  |  |  |  |  |  |  |  |  |
