# Supplementary material
Source: Research Square preprint supplement (doi:10.21203/rs.3.rs-9305286/v1)
Supplement: Supplementary file 4 [file 86c70e4d0fdec337b36ee16a.docx]

| **CK** | **CL** | **J** | **Z** | **5** | **3** | **12** | **24** | **48** |
| --- | --- | --- | --- | --- | --- | --- | --- | --- |
| **check** | **0.4%NaCl** | **ZJ0102** | **Z9807** | **0.5h** | **3h** | **12h** | **24h** | **48h** |
|  |  | **salt-sensitive** | **salt-tolerant** |  |  |  |  |  |

| **Gene** | **J05-CK-1_FPKM** | **J05-CK-1_count** | **J05-CK-2_FPKM** | **J05-CK-2_count** | **J05-CK-3_FPKM** | **J05-CK-3_count** | **J05-CL-1_FPKM** | **J05-CL-1_count** | **J05-CL-2_FPKM** | **J05-CL-2_count** | **J05-CL-3_FPKM** | **J05-CL-3_count** |
| --- | --- | --- | --- | --- | --- | --- | --- | --- | --- | --- | --- | --- |
| **GhPR1-1** | 0.08 | 54 | 1.11 | 64 | 0.19 | 13 | 0.80 | 50 | 1.44 | 82 | 0.56 | 35 |
| **GhPR1-2** | 2.16 | 140 | 2.09 | 132 | 1.75 | 134 | 1.24 | 86 | 0.61 | 38 | 1.28 | 90 |
| **GhPR1-3** | 1.55 | 64 | 2.49 | 99 | 3.53 | 169 | 0.60 | 27 | 0.67 | 27 | 0.39 | 17 |
| **GhPR1-4** | 0.29 | 7 | 0.82 | 18 | 0.13 | 4 | 0.06 | 2 | 0.18 | 4 | 0.25 | 6 |
| **GhPR1-5** | 2.14 | 196 | 4.33 | 385 | 7.66 | 824 | 0.25 | 25 | 1.76 | 155 | 0.55 | 55 |
| **GhPR1-6** | 4.78 | 299 | 5.37 | 326 | 3.84 | 283 | 2.46 | 164 | 4.08 | 245 | 3.82 | 257 |
| **GhPR1-7** | 5.25 | 120 | 4.50 | 100 | 7.05 | 189 | 0.35 | 9 | 0.17 | 4 | 0.34 | 9 |
| **GhPR1-8** | 5.71 | 623 | 6.57 | 696 | 7.69 | 986 | 8.53 | 989 | 7.93 | 832 | 8.49 | 995 |
| **GhPR1-9** | 0.89 | 95 | 0.76 | 79 | 0.94 | 118 | 2.64 | 300 | 2.50 | 257 | 2.29 | 264 |
| **GhPR1-10** | 2.90 | 177 | 2.95 | 174 | 3.25 | 232 | 3.90 | 252 | 3.84 | 224 | 3.11 | 203 |
| **GhPR1-11** | 1.96 | 44 | 1.30 | 28 | 1.84 | 48 | 0.32 | 8 | 0.86 | 19 | 0.51 | 12 |
| **GhPR1-12** | 7.47 | 166 | 8.92 | 192 | 9.07 | 237 | 3.71 | 88 | 4.73 | 101 | 5.37 | 128 |
| **GhPR1-13** | 0.10 | 9 | 0.03 | 3 | 0.10 | 10 | 0.33 | 30 | 0.17 | 14 | 0.30 | 28 |
| **GhPR1-14** | 0 | 0 | 0.09 | 2 | 0.07 | 2 | 0 | 0 | 0 | 0 | 0 | 0 |
| **GhPR1-15** | 0.79 | 10 | 0.49 | 6 | 0.94 | 14 | 0.74 | 10 | 1.55 | 19 | 1.76 | 24 |
| **GhPR1-16** | 4.82 | 160 | 7.28 | 235 | 7.23 | 282 | 0.76 | 27 | 1.26 | 41 | 0.93 | 34 |
| **GhPR1-17** | 1.08 | 110 | 2.13 | 210 | 4.11 | 490 | 0.24 | 26 | 1.54 | 151 | 0.40 | 44 |
| **GhPR1-18** | 1.45 | 14 | 1.39 | 13 | 0.34 | 4 | 6.30 | 61 | 5 | 44 | 7.67 | 75 |
| **GhPR1-19** | 0.11 | 2 | 0.06 | 2 | 0 | 0 | 0.11 | 3 | 0 | 0 | 0.26 | 5 |
| **GhPR1-20** | 9.03 | 207 | 11.74 | 261 | 12.03 | 323 | 1.55 | 38 | 3.23 | 71 | 2.27 | 56 |
| **GhPR1-21** | 6.95 | 181 | 6.04 | 153 | 6.75 | 206 | 6.04 | 167 | 7.52 | 188 | 6.62 | 185 |
| **GhPR1-22** | 1.86 | 77 | 1.76 | 71 | 1.74 | 84 | 1.80 | 79 | 1.55 | 62 | 1.57 | 70 |
| **GhPR1-23** | 2.79 | 181 | 2.97 | 187 | 2.90 | 221 | 2.50 | 172 | 2.89 | 180 | 3.12 | 217 |
| **GhPR1-24** | 0.35 | 9 | 0.08 | 2 | 0.39 | 12 | 1.28 | 35 | 0 | 0 | 0.30 | 8 |
| **GhPR1-25** | 1.09 | 92 | 1.37 | 113 | 1.17 | 117 | 2.59 | 233 | 1.69 | 138 | 1.85 | 168 |
| **GhPR1-26** | 0.85 | 44 | 0.81 | 41 | 0.83 | 51 | 0.22 | 13 | 0.35 | 18 | 0.81 | 45 |
| **GhPR1-27** | 0.02 | 2 | 0.09 | 7 | 0.06 | 6 | 0.05 | 4 | 0.06 | 5 | 0 | 0 |
| **GhPR1-28** | 2.25 | 236 | 2.77 | 281 | 1.36 | 167 | 10.18 | 1132 | 4.86 | 488 | 6.90 | 775 |

| **Gene** | **J3-CK-1_FPKM** | **J3-CK-1_count** | **J3-CK-2_FPKM** | **J3-CK-2_count** | **J3-CK-3_FPKM** | **J3-CK-3_count** | **J3-CL-1_FPKM** | **J3-CL-1_count** | **J3-CL-2_FPKM** | **J3-CL-2_count** | **J3-CL-3_FPKM** | **J3-CL-3_count** |
| --- | --- | --- | --- | --- | --- | --- | --- | --- | --- | --- | --- | --- |
| **GhPR1-1** | 0.89 | 58 | 0.72 | 42 | 1.98 | 112 | 0 | 0 | 1.60 | 80 | 0.39 | 24 |
| **GhPR1-2** | 2.53 | 184 | 2.28 | 144 | 2.31 | 145 | 1.42 | 93 | 1 | 55 | 1.18 | 77 |
| **GhPR1-3** | 1.04 | 48 | 1.36 | 54 | 0.90 | 36 | 0.62 | 26 | 0.38 | 14 | 0.21 | 9 |
| **GhPR1-4** | 0.45 | 12 | 0 | 0 | 0.05 | 1 | 0.32 | 8 | 0.17 | 4 | 0.09 | 2 |
| **GhPR1-5** | 1.19 | 122 | 0.56 | 50 | 0.46 | 41 | 0.45 | 42 | 0.67 | 53 | 0.42 | 39 |
| **GhPR1-6** | 0.77 | 55 | 1.36 | 83 | 0.69 | 42 | 2.16 | 136 | 1.35 | 72 | 0.82 | 52 |
| **GhPR1-7** | 2.37 | 61 | 1.64 | 37 | 0.84 | 19 | 0.37 | 9 | 0.08 | 2 | 0.42 | 10 |
| **GhPR1-8** | 7.08 | 864 | 7.44 | 787 | 6.93 | 731 | 9.55 | 1051 | 9.41 | 874 | 8.65 | 947 |
| **GhPR1-9** | 0.75 | 90 | 0.81 | 84 | 0.91 | 95 | 1.49 | 161 | 1.70 | 155 | 1.76 | 189 |
| **GhPR1-10** | 3 | 203 | 2.84 | 167 | 2.92 | 172 | 3.74 | 229 | 3.29 | 170 | 3.98 | 242 |
| **GhPR1-11** | 0.42 | 11 | 0.40 | 9 | 0.84 | 18 | 0.06 | 2 | 0.03 | 1 | 0.19 | 5 |
| **GhPR1-12** | 6.56 | 163 | 5.86 | 126 | 5.38 | 116 | 4.95 | 111 | 3.63 | 69 | 5.19 | 116 |
| **GhPR1-13** | 0.05 | 5 | 0 | 0 | 0.10 | 9 | 0.11 | 10 | 0.19 | 14 | 0.08 | 7 |
| **GhPR1-14** | 0.16 | 5 | 0.08 | 2 | 0 | 0 | 0 | 0 | 0.09 | 2 | 0 | 0 |
| **GhPR1-15** | 0.96 | 14 | 1.06 | 13 | 1.52 | 18 | 1.79 | 23 | 1.75 | 19 | 1.78 | 22 |
| **GhPR1-16** | 3.03 | 113 | 3.51 | 113 | 3.56 | 115 | 2.27 | 77 | 1.81 | 52 | 0.76 | 26 |
| **GhPR1-17** | 0.71 | 81 | 0.56 | 55 | 0.46 | 45 | 0.66 | 68 | 0.48 | 42 | 0.42 | 43 |
| **GhPR1-18** | 1.52 | 16 | 1.52 | 14 | 1.18 | 11 | 2.43 | 23 | 4.59 | 36 | 1.52 | 14 |
| **GhPR1-19** | 0.10 | 2 | 0 | 0 | 0.51 | 9 | 0 | 0 | 0 | 0 | 0.16 | 3 |
| **GhPR1-20** | 5.57 | 143 | 5.54 | 123 | 4.12 | 91 | 2.42 | 56 | 2.61 | 51 | 1.76 | 41 |
| **GhPR1-21** | 2.25 | 66 | 2.60 | 66 | 2.24 | 57 | 4.27 | 112 | 3.19 | 71 | 3.81 | 100 |
| **GhPR1-22** | 1.56 | 72 | 1.22 | 49 | 1.27 | 51 | 1.36 | 57 | 1.28 | 45 | 1.48 | 61 |
| **GhPR1-23** | 2.27 | 164 | 2.02 | 127 | 1.98 | 124 | 2.69 | 176 | 2.37 | 131 | 1.75 | 114 |
| **GhPR1-24** | 0.10 | 3 | 0.49 | 12 | 0.10 | 3 | 0.20 | 6 | 0.39 | 9 | 0.12 | 4 |
| **GhPR1-25** | 1.95 | 184 | 1.83 | 150 | 1.16 | 95 | 2.29 | 195 | 1.98 | 143 | 1.66 | 141 |
| **GhPR1-26** | 0.41 | 24 | 0.47 | 24 | 0.50 | 25 | 0.59 | 31 | 0.67 | 29 | 0.40 | 21 |
| **GhPR1-27** | 0.02 | 2 | 0 | 0 | 0 | 0 | 0.06 | 5 | 0 | 0 | 0.03 | 2 |
| **GhPR1-28** | 1.03 | 121 | 1.50 | 152 | 0.62 | 63 | 1.80 | 191 | 1.57 | 140 | 1.56 | 164 |

| **Gene** | **J12-CK-1_FPKM** | **J12-CK-1_count** | **J12-CK-2_FPKM** | **J12-CK-2_count** | **J12-CK-3_FPKM** | **J12-CK-3_count** | **J12-CL-1_FPKM** | **J12-CL-1_count** | **J12-CL-2_FPKM** | **J12-CL-2_count** | **J12-CL-3_FPKM** | **J12-CL-3_count** |
| --- | --- | --- | --- | --- | --- | --- | --- | --- | --- | --- | --- | --- |
| **GhPR1-1** | 0.09 | 6 | 0.34 | 21 | 0.87 | 57 | 0.76 | 47 | 0.10 | 6 | 0.92 | 47 |
| **GhPR1-2** | 3.08 | 220 | 2.73 | 189 | 2.22 | 162 | 1.06 | 73 | 1.19 | 69 | 0.85 | 49 |
| **GhPR1-3** | 0.53 | 24 | 0.28 | 12 | 0.45 | 21 | 0.29 | 13 | 0.08 | 3 | 0.37 | 14 |
| **GhPR1-4** | 0.55 | 14 | 0 | 0 | 0.14 | 4 | 0 | 0 | 0.18 | 4 | 0 | 0 |
| **GhPR1-5** | 1.43 | 144 | 0.30 | 30 | 0.45 | 47 | 0.24 | 24 | 0 | 0 | 0.16 | 13 |
| **GhPR1-6** | 0.67 | 47 | 0.42 | 28 | 0.35 | 25 | 0.07 | 5 | 0.11 | 6 | 0.14 | 8 |
| **GhPR1-7** | 6.41 | 161 | 5.07 | 124 | 5.66 | 146 | 0.62 | 15 | 0.23 | 5 | 0.86 | 18 |
| **GhPR1-8** | 8.61 | 1032 | 9.27 | 1078 | 8.90 | 1092 | 13.63 | 1573 | 11.74 | 1137 | 12.20 | 1174 |
| **GhPR1-9** | 0.62 | 73 | 0.27 | 32 | 0.80 | 96 | 1.25 | 142 | 1.63 | 155 | 1.89 | 178 |
| **GhPR1-10** | 3.59 | 239 | 4.17 | 269 | 2.94 | 201 | 4.32 | 278 | 5.46 | 294 | 3.77 | 202 |
| **GhPR1-11** | 0.86 | 21 | 0.37 | 9 | 0.81 | 21 | 0 | 0 | 0 | 0 | 0.19 | 4 |
| **GhPR1-12** | 13.81 | 336 | 8.26 | 195 | 12.99 | 324 | 2.78 | 66 | 3.37 | 67 | 10.97 | 215 |
| **GhPR1-13** | 0.03 | 3 | 0.11 | 10 | 0.01 | 2 | 0.07 | 6 | 0.14 | 11 | 0.04 | 3 |
| **GhPR1-14** | 0.14 | 4 | 0.07 | 2 | 0.22 | 6 | 0 | 0 | 0 | 0 | 0 | 0 |
| **GhPR1-15** | 1.98 | 27 | 1.90 | 25 | 1.69 | 24 | 1.79 | 24 | 1.89 | 21 | 1.41 | 16 |
| **GhPR1-16** | 1.18 | 44 | 0.26 | 10 | 1.26 | 47 | 0.51 | 18 | 0.30 | 9 | 0.49 | 15 |
| **GhPR1-17** | 0.62 | 69 | 0.47 | 51 | 0.48 | 56 | 0.17 | 19 | 0.14 | 14 | 0.24 | 22 |
| **GhPR1-18** | 2.75 | 28 | 3.51 | 35 | 1.51 | 16 | 3.91 | 38 | 4.88 | 40 | 5.27 | 43 |
| **GhPR1-19** | 0.34 | 7 | 0 | 0 | 0.03 | 1 | 0.26 | 5 | 0.23 | 4 | 0.36 | 6 |
| **GhPR1-20** | 13.85 | 348 | 11.90 | 290 | 15.64 | 402 | 3.37 | 82 | 3.40 | 69 | 3.68 | 75 |
| **GhPR1-21** | 1.24 | 36 | 1.35 | 38 | 0.99 | 29 | 0.61 | 17 | 0.84 | 20 | 0.57 | 13 |
| **GhPR1-22** | 2.21 | 100 | 2.85 | 125 | 1.95 | 91 | 3.43 | 149 | 2.41 | 88 | 2 | 73 |
| **GhPR1-23** | 3.11 | 221 | 0.91 | 63 | 3.54 | 257 | 1.21 | 83 | 1.53 | 88 | 1.63 | 94 |
| **GhPR1-24** | 0.97 | 27 | 4.15 | 111 | 0.50 | 15 | 0.24 | 7 | 0.09 | 3 | 1.07 | 24 |
| **GhPR1-25** | 3.29 | 305 | 1.77 | 160 | 3.04 | 289 | 1.76 | 158 | 2.26 | 170 | 2.15 | 160 |
| **GhPR1-26** | 0.71 | 40 | 0.60 | 33 | 0.74 | 43 | 0.26 | 14 | 0.35 | 16 | 0.26 | 12 |
| **GhPR1-27** | 0 | 0 | 0.10 | 9 | 0.02 | 2 | 0.02 | 2 | 0.07 | 6 | 0.06 | 5 |
| **GhPR1-28** | 0.99 | 114 | 1.68 | 188 | 1.30 | 153 | 3.70 | 410 | 5.44 | 505 | 4.21 | 388 |

| **Gene** | **J24-CK-1_FPKM** | **J24-CK-1_count** | **J24-CK-2_FPKM** | **J24-CK-2_count** | **J24-CK-3_FPKM** | **J24-CK-3_count** | **J24-CL-1_FPKM** | **J24-CL-1_count** | **J24-CL-2_FPKM** | **J24-CL-2_count** | **J24-CL-3_FPKM** | **J24-CL-3_count** |
| --- | --- | --- | --- | --- | --- | --- | --- | --- | --- | --- | --- | --- |
| **GhPR1-1** | 0.16 | 11 | 0.17 | 13 | 0.90 | 67 | 0.78 | 50 | 0.41 | 26 | 0.22 | 13 |
| **GhPR1-2** | 0.91 | 66 | 0.84 | 71 | 0.47 | 39 | 1.50 | 107 | 1.18 | 83 | 0.69 | 45 |
| **GhPR1-3** | 0.09 | 5 | 0.17 | 10 | 0.23 | 12 | 0.11 | 5 | 0.21 | 10 | 0.06 | 3 |
| **GhPR1-4** | 0.15 | 4 | 0.17 | 5 | 0.11 | 3 | 0 | 0 | 0 | 0 | 0 | 0 |
| **GhPR1-5** | 0.08 | 8 | 0.10 | 12 | 0.13 | 16 | 0.05 | 6 | 0.06 | 7 | 0.04 | 4 |
| **GhPR1-6** | 5.33 | 371 | 6.42 | 521 | 7.50 | 591 | 2.47 | 170 | 3.99 | 269 | 2.82 | 175 |
| **GhPR1-7** | 1.46 | 38 | 2.82 | 84 | 1.92 | 56 | 0.18 | 5 | 0.09 | 3 | 0.20 | 5 |
| **GhPR1-8** | 6.24 | 759 | 7.17 | 1015 | 7.06 | 971 | 10.25 | 1226 | 9.23 | 1086 | 8.15 | 880 |
| **GhPR1-9** | 0.49 | 59 | 0.50 | 69 | 0.70 | 95 | 1.14 | 134 | 0.96 | 111 | 1.44 | 152 |
| **GhPR1-10** | 3.04 | 206 | 3.03 | 238 | 2.79 | 213 | 4.89 | 325 | 4.05 | 265 | 3.66 | 220 |
| **GhPR1-11** | 0.61 | 15 | 1.06 | 31 | 1.36 | 38 | 0.05 | 2 | 0.07 | 2 | 0 | 0 |
| **GhPR1-12** | 6.20 | 153 | 6.23 | 180 | 7.16 | 200 | 2.74 | 67 | 2.45 | 59 | 1.95 | 43 |
| **GhPR1-13** | 0.13 | 13 | 0.24 | 27 | 0.09 | 10 | 0.49 | 46 | 0.67 | 62 | 0.75 | 63 |
| **GhPR1-14** | 0.15 | 4 | 0.18 | 6 | 0 | 0 | 0 | 0 | 0.08 | 2 | 0 | 0 |
| **GhPR1-15** | 0.50 | 7 | 0.76 | 12 | 0.46 | 8 | 1.88 | 26 | 1.21 | 16 | 2 | 25 |
| **GhPR1-16** | 0.39 | 15 | 0.79 | 34 | 1.19 | 50 | 0.13 | 5 | 0.06 | 2 | 0.12 | 4 |
| **GhPR1-17** | 0.07 | 8 | 0.21 | 28 | 0.27 | 35 | 0.18 | 21 | 0.05 | 6 | 0.01 | 2 |
| **GhPR1-18** | 1.74 | 18 | 0.77 | 10 | 1.33 | 16 | 1.82 | 19 | 2.27 | 23 | 1.96 | 18 |
| **GhPR1-19** | 0.10 | 2 | 0.18 | 4 | 0 | 0 | 0.50 | 10 | 0.18 | 4 | 0.25 | 5 |
| **GhPR1-20** | 4.35 | 111 | 8.88 | 263 | 8.15 | 235 | 1.40 | 36 | 0.97 | 24 | 0.94 | 22 |
| **GhPR1-21** | 7.99 | 231 | 8.04 | 271 | 12.60 | 412 | 2.52 | 72 | 3.32 | 93 | 2.65 | 69 |
| **GhPR1-22** | 2.09 | 96 | 1.93 | 103 | 2.08 | 108 | 2.73 | 123 | 1.92 | 85 | 1.63 | 67 |
| **GhPR1-23** | 0.85 | 62 | 1.42 | 120 | 1.37 | 112 | 1.19 | 85 | 1.05 | 74 | 0.65 | 42 |
| **GhPR1-24** | 2.99 | 84 | 2.74 | 90 | 0.88 | 28 | 35.26 | 971 | 19.24 | 522 | 2.49 | 62 |
| **GhPR1-25** | 2.12 | 199 | 1.22 | 134 | 1.52 | 162 | 3.18 | 295 | 2.71 | 247 | 3.46 | 289 |
| **GhPR1-26** | 0.38 | 22 | 0.27 | 18 | 0.38 | 25 | 0.23 | 13 | 0.10 | 6 | 0.15 | 8 |
| **GhPR1-27** | 0.16 | 14 | 0.08 | 9 | 0.08 | 8 | 0.26 | 23 | 0.04 | 4 | 0.24 | 19 |
| **GhPR1-28** | 6.61 | 770 | 5.24 | 711 | 4.66 | 614 | 9.15 | 1048 | 9.59 | 1081 | 12.51 | 1294 |

| **Gene** | **J48-CK-1_FPKM** | **J48-CK-1_count** | **J48-CK-2_FPKM** | **J48-CK-2_count** | **J48-CK-3_FPKM** | **J48-CK-3_count** | **J48-CL-1_FPKM** | **J48-CL-1_count** | **J48-CL-2_FPKM** | **J48-CL-2_count** | **J48-CL-3_FPKM** | **J48-CL-3_count** |
| --- | --- | --- | --- | --- | --- | --- | --- | --- | --- | --- | --- | --- |
| **GhPR1-1** | 0.18 | 11 | 0.97 | 60 | 0.80 | 51 | 0.14 | 9 | 0.35 | 21 | 0.87 | 58 |
| **GhPR1-2** | 1.51 | 105 | 1.13 | 78 | 1.52 | 107 | 5.16 | 362 | 5.34 | 355 | 4.42 | 329 |
| **GhPR1-3** | 0.96 | 42 | 2.25 | 97 | 0.60 | 27 | 0 | 0 | 0 | 0 | 0 | 0 |
| **GhPR1-4** | 0.82 | 20 | 0.11 | 3 | 0.35 | 9 | 0 | 0 | 0 | 0 | 0 | 0 |
| **GhPR1-5** | 0.32 | 32 | 3.31 | 321 | 0.05 | 6 | 0 | 0 | 0 | 0 | 0 | 0 |
| **GhPR1-6** | 12.83 | 857 | 10.03 | 663 | 9.39 | 635 | 0.03 | 2 | 0.11 | 8 | 0.06 | 5 |
| **GhPR1-7** | 2 | 49 | 1.93 | 47 | 0.83 | 21 | 0 | 0 | 0.04 | 1 | 0 | 0 |
| **GhPR1-8** | 5.12 | 597 | 5.63 | 650 | 5.59 | 660 | 20.47 | 2415 | 19.79 | 2213 | 17.03 | 2130 |
| **GhPR1-9** | 1.25 | 144 | 0.87 | 98 | 0.94 | 109 | 0.26 | 31 | 0.42 | 47 | 0.53 | 65 |
| **GhPR1-10** | 2.77 | 179 | 3 | 193 | 3.14 | 206 | 5.56 | 365 | 5.43 | 338 | 6.37 | 443 |
| **GhPR1-11** | 0.07 | 2 | 0.53 | 13 | 0.34 | 9 | 0.04 | 2 | 0 | 0 | 0 | 0 |
| **GhPR1-12** | 4.48 | 107 | 5.10 | 120 | 2.57 | 62 | 1.36 | 33 | 3.03 | 69 | 2.91 | 74 |
| **GhPR1-13** | 0.15 | 14 | 0.08 | 8 | 0.36 | 33 | 0.18 | 17 | 0.17 | 15 | 0.42 | 41 |
| **GhPR1-14** | 0 | 0 | 0.08 | 2 | 0 | 0 | 0 | 0 | 0.12 | 3 | 0 | 0 |
| **GhPR1-15** | 1.07 | 14 | 1.03 | 14 | 0.89 | 12 | 2.31 | 31 | 1.37 | 18 | 1.69 | 24 |
| **GhPR1-16** | 3.34 | 119 | 4.87 | 171 | 0.98 | 36 | 0 | 0 | 0 | 0 | 0 | 0 |
| **GhPR1-17** | 0.47 | 51 | 2.22 | 238 | 0.08 | 9 | 0 | 0 | 0 | 0 | 0 | 0 |
| **GhPR1-18** | 0.37 | 4 | 0.90 | 9 | 1.30 | 13 | 4.11 | 41 | 3.47 | 33 | 3.63 | 38 |
| **GhPR1-19** | 0 | 0 | 0.08 | 2 | 0.26 | 5 | 0.18 | 4 | 0.39 | 7 | 0 | 0 |
| **GhPR1-20** | 9.42 | 230 | 7.38 | 179 | 6.40 | 158 | 0 | 0 | 0.09 | 2 | 0.07 | 2 |
| **GhPR1-21** | 18.50 | 513 | 15.92 | 437 | 14.86 | 418 | 0 | 0 | 0.04 | 1 | 0.15 | 5 |
| **GhPR1-22** | 1.48 | 65 | 1.02 | 45 | 1.36 | 61 | 1.51 | 68 | 2.48 | 105 | 1.29 | 61 |
| **GhPR1-23** | 3 | 207 | 3.80 | 260 | 2.40 | 169 | 0 | 0 | 0.08 | 6 | 0.02 | 2 |
| **GhPR1-24** | 0.40 | 11 | 0.08 | 3 | 0.14 | 4 | 7.72 | 210 | 9.66 | 249 | 14.90 | 430 |
| **GhPR1-25** | 3.14 | 283 | 2.85 | 255 | 3.18 | 290 | 1.61 | 147 | 3.32 | 288 | 4.36 | 422 |
| **GhPR1-26** | 0.80 | 44 | 0.53 | 29 | 0.58 | 33 | 0.83 | 46 | 0.55 | 29 | 0.93 | 55 |
| **GhPR1-27** | 0.06 | 5 | 0.09 | 8 | 0.21 | 19 | 0 | 0 | 0.03 | 3 | 0 | 0 |
| **GhPR1-28** | 3.83 | 428 | 3.68 | 407 | 5.51 | 623 | 2.14 | 243 | 2.03 | 218 | 2.84 | 341 |

| **Gene** | **Z05-CK-1_FPKM** | **Z05-CK-1_count** | **Z05-CK-2_FPKM** | **Z05-CK-2_count** | **Z05-CK-3_FPKM** | **Z05-CK-3_count** | **Z05-CL-1_FPKM** | **Z05-CL-1_count** | **Z05-CL-2_FPKM** | **Z05-CL-2_count** | **Z05-CL-3_FPKM** | **Z05-CL-3_count** |
| --- | --- | --- | --- | --- | --- | --- | --- | --- | --- | --- | --- | --- |
| **GhPR1-1** | 0 | 0 | 1.88 | 91 | 0.06 | 4 | 1.12 | 74 | 0.26 | 19 | 0.30 | 16 |
| **GhPR1-2** | 2.04 | 111 | 2.73 | 147 | 1.87 | 129 | 1.57 | 116 | 1.84 | 143 | 2.19 | 128 |
| **GhPR1-3** | 0.70 | 24 | 3.31 | 112 | 0.58 | 25 | 0.95 | 44 | 0.06 | 3 | 1.31 | 48 |
| **GhPR1-4** | 0 | 0 | 0.03 | 1 | 0 | 0 | 0.11 | 3 | 0 | 0 | 0.12 | 3 |
| **GhPR1-5** | 0.15 | 12 | 7.20 | 545 | 0.59 | 57 | 2.04 | 212 | 0 | 0 | 6.20 | 509 |
| **GhPR1-6** | 4.77 | 249 | 5.12 | 266 | 2.66 | 177 | 3.84 | 273 | 2.32 | 174 | 3.43 | 193 |
| **GhPR1-7** | 3.41 | 65 | 4.81 | 91 | 2.03 | 50 | 2.22 | 58 | 0.28 | 8 | 3.52 | 72 |
| **GhPR1-8** | 5.75 | 525 | 5.86 | 530 | 5.37 | 621 | 6.91 | 854 | 6.99 | 915 | 6.58 | 645 |
| **GhPR1-9** | 1.05 | 94 | 1.34 | 119 | 1.11 | 126 | 1.45 | 175 | 1.46 | 187 | 0.97 | 93 |
| **GhPR1-10** | 2.01 | 102 | 2.20 | 111 | 2.48 | 160 | 2.92 | 201 | 2.65 | 193 | 2.53 | 138 |
| **GhPR1-11** | 0.57 | 11 | 1.24 | 23 | 0.68 | 16 | 2.08 | 52 | 0.47 | 13 | 1.72 | 34 |
| **GhPR1-12** | 5.56 | 103 | 6.36 | 117 | 4.88 | 115 | 13.42 | 337 | 1.68 | 45 | 7.36 | 147 |
| **GhPR1-13** | 0 | 0 | 0 | 0 | 0.28 | 26 | 0.40 | 39 | 0.16 | 16 | 0.31 | 24 |
| **GhPR1-14** | 0 | 0 | 0 | 0 | 0 | 0 | 0 | 0 | 0 | 0 | 0.09 | 2 |
| **GhPR1-15** | 1.47 | 16 | 1.20 | 13 | 0.70 | 10 | 0.50 | 7 | 0.90 | 14 | 1.30 | 15 |
| **GhPR1-16** | 2.69 | 75 | 9.24 | 254 | 2.02 | 72 | 3.31 | 125 | 0.41 | 17 | 3.56 | 106 |
| **GhPR1-17** | 0.13 | 11 | 4.15 | 349 | 0.21 | 24 | 1.08 | 124 | 0.07 | 8 | 3.31 | 302 |
| **GhPR1-18** | 1.02 | 8 | 0.60 | 5 | 2.17 | 21 | 2.54 | 27 | 3.16 | 35 | 1.63 | 14 |
| **GhPR1-19** | 0.21 | 3 | 0.27 | 4 | 0 | 0 | 0.18 | 4 | 0.33 | 7 | 0.36 | 6 |
| **GhPR1-20** | 5.13 | 98 | 9.58 | 182 | 4.10 | 100 | 6.66 | 173 | 1.88 | 52 | 6.89 | 141 |
| **GhPR1-21** | 5.43 | 118 | 7.48 | 161 | 3.94 | 109 | 5.56 | 164 | 2.48 | 78 | 5.98 | 140 |
| **GhPR1-22** | 2.43 | 84 | 2 | 69 | 2.15 | 94 | 2.05 | 96 | 2.28 | 113 | 2.40 | 89 |
| **GhPR1-23** | 2.02 | 109 | 4.59 | 246 | 1.44 | 100 | 1.93 | 142 | 2.42 | 188 | 2.70 | 157 |
| **GhPR1-24** | 0.09 | 2 | 0.11 | 3 | 0 | 0 | 0.24 | 7 | 0 | 0 | 0.07 | 2 |
| **GhPR1-25** | 1.14 | 81 | 0.99 | 70 | 1.11 | 100 | 1.63 | 157 | 1.35 | 137 | 1.92 | 146 |
| **GhPR1-26** | 1.31 | 56 | 1.14 | 49 | 1.20 | 66 | 0.43 | 25 | 0.63 | 39 | 0.53 | 25 |
| **GhPR1-27** | 0.03 | 2 | 0 | 0 | 0.05 | 5 | 0.14 | 13 | 0.19 | 19 | 0 | 0 |
| **GhPR1-28** | 2.87 | 251 | 1.92 | 167 | 4.39 | 487 | 4.26 | 505 | 6.64 | 833 | 3.98 | 374 |

| **Gene** | **Z3-CK-1_FPKM** | **Z3-CK-1_count** | **Z3-CK-2_FPKM** | **Z3-CK-2_count** | **Z3-CK-3_FPKM** | **Z3-CK-3_count** | **Z3-CL-1_FPKM** | **Z3-CL-1_count** | **Z3-CL-2_FPKM** | **Z3-CL-2_count** | **Z3-CL-3_FPKM** | **Z3-CL-3_count** |
| --- | --- | --- | --- | --- | --- | --- | --- | --- | --- | --- | --- | --- |
| **GhPR1-1** | 1.11 | 59 | 1.17 | 69 | 0.81 | 45 | 0.65 | 40 | 2.03 | 102 | 0.56 | 34 |
| **GhPR1-2** | 3.40 | 200 | 3.14 | 203 | 3.37 | 210 | 1.97 | 136 | 1.59 | 89 | 1.27 | 87 |
| **GhPR1-3** | 0.30 | 11 | 1.04 | 43 | 2.34 | 92 | 0 | 0 | 0.59 | 21 | 0 | 0 |
| **GhPR1-4** | 0 | 0 | 0 | 0 | 0 | 0 | 0.02 | 1 | 0.19 | 4 | 0 | 0 |
| **GhPR1-5** | 0.09 | 8 | 1.33 | 121 | 7.46 | 654 | 0.02 | 2 | 1.33 | 105 | 0.12 | 12 |
| **GhPR1-6** | 0.41 | 24 | 1.02 | 64 | 1.87 | 112 | 0.75 | 50 | 2.04 | 110 | 0.43 | 29 |
| **GhPR1-7** | 0.66 | 14 | 1.43 | 33 | 1.95 | 43 | 0.16 | 4 | 0.98 | 20 | 0.07 | 2 |
| **GhPR1-8** | 6.93 | 684 | 6.70 | 728 | 7.61 | 796 | 9.33 | 1084 | 8.79 | 827 | 7.56 | 862 |
| **GhPR1-9** | 0.92 | 89 | 1.26 | 134 | 0.92 | 95 | 1.94 | 222 | 1.52 | 141 | 1.79 | 200 |
| **GhPR1-10** | 2.97 | 164 | 2.91 | 176 | 3.67 | 214 | 2.76 | 179 | 3.46 | 181 | 3.50 | 222 |
| **GhPR1-11** | 0.97 | 20 | 0.89 | 20 | 0.42 | 9 | 0.23 | 6 | 0.68 | 13 | 0.20 | 5 |
| **GhPR1-12** | 6.27 | 126 | 6.64 | 147 | 9.72 | 207 | 5.37 | 127 | 6.59 | 126 | 10.96 | 254 |
| **GhPR1-13** | 0.09 | 8 | 0.05 | 5 | 0 | 0 | 0.20 | 19 | 0.08 | 7 | 0.21 | 19 |
| **GhPR1-14** | 0 | 0 | 0.09 | 2 | 0 | 0 | 0 | 0 | 0.29 | 6 | 0.15 | 4 |
| **GhPR1-15** | 1.39 | 16 | 0.66 | 9 | 1.76 | 21 | 0.65 | 9 | 1.80 | 19 | 0.65 | 9 |
| **GhPR1-16** | 1.07 | 33 | 5.56 | 184 | 5.02 | 160 | 0.30 | 11 | 3.04 | 87 | 0.39 | 14 |
| **GhPR1-17** | 0.34 | 31 | 1.34 | 136 | 4.10 | 399 | 0.05 | 6 | 0.82 | 72 | 0.13 | 15 |
| **GhPR1-18** | 2.50 | 21 | 0.97 | 9 | 0.72 | 7 | 3.21 | 32 | 2.30 | 19 | 2.43 | 24 |
| **GhPR1-19** | 0.15 | 3 | 0.15 | 3 | 0 | 0 | 0.11 | 2 | 0 | 0 | 0.10 | 2 |
| **GhPR1-20** | 3.11 | 65 | 3.02 | 69 | 5.17 | 114 | 0.84 | 21 | 2.39 | 48 | 0.86 | 21 |
| **GhPR1-21** | 1.09 | 26 | 2.12 | 55 | 3.42 | 85 | 1.27 | 36 | 5.15 | 116 | 1.06 | 29 |
| **GhPR1-22** | 2.25 | 84 | 1.24 | 51 | 0.61 | 24 | 1.58 | 70 | 1.80 | 64 | 1.84 | 79 |
| **GhPR1-23** | 1.75 | 103 | 2.38 | 154 | 2.95 | 183 | 1.85 | 128 | 2.34 | 131 | 1.88 | 127 |
| **GhPR1-24** | 0.17 | 4 | 0.20 | 5 | 0 | 0 | 0.21 | 6 | 0.06 | 2 | 0.96 | 26 |
| **GhPR1-25** | 0.94 | 72 | 1.36 | 114 | 2.32 | 188 | 2.49 | 224 | 1.90 | 139 | 1.47 | 130 |
| **GhPR1-26** | 0.39 | 19 | 0.97 | 50 | 1.34 | 66 | 0.62 | 35 | 1.07 | 48 | 0.32 | 17 |
| **GhPR1-27** | 0.10 | 8 | 0.05 | 4 | 0.06 | 5 | 0.05 | 4 | 0.06 | 4 | 0.12 | 11 |
| **GhPR1-28** | 1.58 | 150 | 1.49 | 155 | 0.69 | 70 | 4.01 | 447 | 1.96 | 177 | 2.62 | 287 |

| **Gene** | **Z12-CK-1_FPKM** | **Z12-CK-1_count** | **Z12-CK-2_FPKM** | **Z12-CK-2_count** | **Z12-CK-3_FPKM** | **Z12-CK-3_count** | **Z12-CL-1_FPKM** | **Z12-CL-1_count** | **Z12-CL-2_FPKM** | **Z12-CL-2_count** | **Z12-CL-3_FPKM** | **Z12-CL-3_count** |
| --- | --- | --- | --- | --- | --- | --- | --- | --- | --- | --- | --- | --- |
| **GhPR1-1** | 0.58 | 37 | 0.28 | 17 | 0.69 | 37 | 0 | 0 | 0.41 | 25 | 0.13 | 11 |
| **GhPR1-2** | 2.13 | 149 | 3.10 | 208 | 2.85 | 171 | 1.74 | 123 | 1.84 | 122 | 1.82 | 162 |
| **GhPR1-3** | 0.60 | 27 | 0.36 | 16 | 0.24 | 9 | 0.45 | 20 | 0.47 | 20 | 0.10 | 6 |
| **GhPR1-4** | 0 | 0 | 0 | 0 | 0 | 0 | 0 | 0 | 0.08 | 2 | 0.02 | 1 |
| **GhPR1-5** | 1.51 | 149 | 0.35 | 34 | 0.57 | 48 | 0.20 | 20 | 0.38 | 36 | 0.24 | 31 |
| **GhPR1-6** | 0.46 | 32 | 0.35 | 23 | 0.38 | 22 | 0.54 | 37 | 0.45 | 29 | 0.19 | 16 |
| **GhPR1-7** | 5.42 | 134 | 5.36 | 127 | 5.67 | 120 | 3.47 | 86 | 1.72 | 41 | 1.15 | 37 |
| **GhPR1-8** | 8.11 | 953 | 9.04 | 1019 | 9.72 | 981 | 10.78 | 1279 | 12.50 | 1390 | 13.11 | 1955 |
| **GhPR1-9** | 0.72 | 84 | 0.33 | 37 | 0.48 | 47 | 0.65 | 76 | 0.76 | 83 | 1.12 | 164 |
| **GhPR1-10** | 3.73 | 244 | 4.47 | 281 | 3.17 | 178 | 5.54 | 365 | 4.39 | 271 | 4.53 | 376 |
| **GhPR1-11** | 0.50 | 12 | 0.26 | 6 | 0.71 | 15 | 0.07 | 2 | 0 | 0 | 0 | 0 |
| **GhPR1-12** | 7.47 | 179 | 3.55 | 82 | 3.65 | 75 | 7.30 | 176 | 6.29 | 142 | 4.19 | 127 |
| **GhPR1-13** | 0.17 | 17 | 0.12 | 11 | 0.06 | 5 | 0.12 | 12 | 0.03 | 3 | 0 | 0 |
| **GhPR1-14** | 0.15 | 4 | 0 | 0 | 0 | 0 | 0.07 | 2 | 0.07 | 2 | 0.03 | 1 |
| **GhPR1-15** | 2.61 | 35 | 2.07 | 27 | 1.75 | 20 | 2.91 | 39 | 3.50 | 44 | 1.99 | 34 |
| **GhPR1-16** | 1.77 | 64 | 0.73 | 25 | 0.81 | 25 | 0.36 | 14 | 0.40 | 14 | 0.11 | 5 |
| **GhPR1-17** | 1.03 | 113 | 0.24 | 26 | 0.29 | 28 | 0.27 | 30 | 0.36 | 38 | 0.27 | 38 |
| **GhPR1-18** | 2.39 | 24 | 2.54 | 24 | 1.86 | 16 | 7.08 | 71 | 3.67 | 35 | 5.08 | 64 |
| **GhPR1-19** | 0.09 | 2 | 0.06 | 2 | 0.63 | 10 | 0.11 | 2 | 0 | 0 | 0.36 | 9 |
| **GhPR1-20** | 13.37 | 329 | 13.03 | 308 | 14.52 | 307 | 7.61 | 189 | 7.26 | 169 | 3.88 | 121 |
| **GhPR1-21** | 1.35 | 38 | 0.98 | 27 | 1.48 | 36 | 1.32 | 38 | 0.80 | 22 | 0.20 | 7 |
| **GhPR1-22** | 2.62 | 116 | 3.82 | 162 | 3.58 | 136 | 3.24 | 145 | 2.66 | 112 | 3.23 | 182 |
| **GhPR1-23** | 1.45 | 102 | 1.11 | 75 | 1.51 | 91 | 1.02 | 72 | 0.81 | 54 | 1.11 | 99 |
| **GhPR1-24** | 1.62 | 44 | 1.35 | 36 | 0.24 | 6 | 0.65 | 18 | 0.11 | 3 | 0.09 | 3 |
| **GhPR1-25** | 2.52 | 230 | 2.58 | 225 | 2.75 | 215 | 1.79 | 165 | 2.12 | 182 | 1.70 | 196 |
| **GhPR1-26** | 0.65 | 36 | 0.91 | 49 | 1.04 | 50 | 0.34 | 20 | 0.40 | 22 | 0.37 | 26 |
| **GhPR1-27** | 0.03 | 3 | 0 | 0 | 0.05 | 4 | 0.07 | 7 | 0 | 0 | 0 | 0 |
| **GhPR1-28** | 1.95 | 220 | 1.45 | 157 | 1.41 | 137 | 3.03 | 344 | 1.12 | 120 | 1.57 | 224 |

| **Gene** | **Z24-CK-1_FPKM** | **Z24-CK-1_count** | **Z24-CK-2_FPKM** | **Z24-CK-2_count** | **Z24-CK-3_FPKM** | **Z24-CK-3_count** | **Z24-CL-1_FPKM** | **Z24-CL-1_count** | **Z24-CL-2_FPKM** | **Z24-CL-2_count** | **Z24-CL-3_FPKM** | **Z24-CL-3_count** |
| --- | --- | --- | --- | --- | --- | --- | --- | --- | --- | --- | --- | --- |
| **GhPR1-1** | 1.44 | 88 | 0.44 | 28 | 0.44 | 24 | 0.37 | 19 | 0.50 | 30 | 0.10 | 7 |
| **GhPR1-2** | 1.06 | 72 | 0.75 | 52 | 0.88 | 52 | 0.99 | 56 | 0.38 | 24 | 1.76 | 128 |
| **GhPR1-3** | 0.17 | 8 | 0.20 | 9 | 0.03 | 2 | 0 | 0 | 0 | 0 | 0 | 0 |
| **GhPR1-4** | 0.09 | 3 | 0.08 | 2 | 0 | 0 | 0 | 0 | 0 | 0 | 0 | 0 |
| **GhPR1-5** | 0.10 | 10 | 0.42 | 41 | 0 | 0 | 0 | 0 | 0.01 | 1 | 0.01 | 2 |
| **GhPR1-6** | 9.43 | 615 | 8.94 | 592 | 7.65 | 434 | 0.86 | 47 | 2.50 | 153 | 2.63 | 185 |
| **GhPR1-7** | 1.30 | 31 | 2.11 | 51 | 0.47 | 10 | 0.04 | 1 | 0 | 0 | 0.19 | 5 |
| **GhPR1-8** | 6.93 | 790 | 6.81 | 786 | 5.97 | 590 | 8.46 | 802 | 7.78 | 827 | 9.88 | 1207 |
| **GhPR1-9** | 0.65 | 73 | 0.48 | 55 | 0.91 | 89 | 2.13 | 198 | 1.60 | 167 | 1.24 | 149 |
| **GhPR1-10** | 3.21 | 203 | 3.50 | 225 | 3.66 | 201 | 3.66 | 193 | 3.23 | 191 | 4.34 | 295 |
| **GhPR1-11** | 0.89 | 21 | 1.31 | 31 | 0.40 | 9 | 0.10 | 2 | 0 | 0 | 0 | 0 |
| **GhPR1-12** | 8.51 | 197 | 9.49 | 223 | 5.58 | 112 | 1.86 | 36 | 2.34 | 51 | 1.64 | 41 |
| **GhPR1-13** | 1.18 | 106 | 0.73 | 66 | 0.47 | 36 | 0.91 | 68 | 0.87 | 72 | 0.82 | 79 |
| **GhPR1-14** | 0 | 0 | 0 | 0 | 0 | 0 | 0 | 0 | 0 | 0 | 0.14 | 4 |
| **GhPR1-15** | 0.86 | 11 | 1.39 | 18 | 0.86 | 10 | 0.27 | 3 | 1.23 | 15 | 2.31 | 32 |
| **GhPR1-16** | 0.32 | 12 | 0.61 | 22 | 0.07 | 2 | 0.28 | 8 | 0 | 0 | 0.22 | 8 |
| **GhPR1-17** | 0.14 | 15 | 0.40 | 44 | 0 | 0 | 0.09 | 9 | 0.03 | 3 | 0.07 | 8 |
| **GhPR1-18** | 1.19 | 12 | 1.33 | 13 | 0.77 | 7 | 3.80 | 30 | 4.80 | 43 | 2.80 | 29 |
| **GhPR1-19** | 0.29 | 6 | 0.14 | 3 | 0.11 | 2 | 0.13 | 2 | 0.05 | 1 | 0.37 | 7 |
| **GhPR1-20** | 3.84 | 92 | 5.19 | 126 | 3.18 | 66 | 0.10 | 2 | 0.17 | 4 | 0.41 | 11 |
| **GhPR1-21** | 9.74 | 264 | 10.73 | 295 | 10.30 | 243 | 1.65 | 38 | 1.97 | 50 | 3.34 | 98 |
| **GhPR1-22** | 1.64 | 71 | 1.96 | 85 | 1.66 | 62 | 1.24 | 45 | 1.61 | 65 | 1.33 | 62 |
| **GhPR1-23** | 1.73 | 117 | 1.48 | 102 | 1.05 | 62 | 1.03 | 58 | 1.14 | 72 | 0.89 | 65 |
| **GhPR1-24** | 0.44 | 12 | 1.19 | 32 | 0.58 | 14 | 0.11 | 3 | 0.02 | 1 | 0 | 0 |
| **GhPR1-25** | 1.67 | 148 | 1.24 | 111 | 1.31 | 101 | 1.94 | 142 | 2.66 | 219 | 2.05 | 194 |
| **GhPR1-26** | 0.59 | 32 | 0.74 | 41 | 0.19 | 9 | 0.32 | 15 | 0.11 | 6 | 0.18 | 11 |
| **GhPR1-27** | 0.47 | 40 | 0.20 | 17 | 0.21 | 16 | 0.10 | 7 | 0.17 | 13 | 0.17 | 16 |
| **GhPR1-28** | 9.82 | 1071 | 8.40 | 929 | 7.24 | 686 | 15.21 | 1380 | 17.79 | 1809 | 14.53 | 1701 |

| **Gene** | **Z48-CK-1_FPKM** | **Z48-CK-1_count** | **Z48-CK-2_FPKM** | **Z48-CK-2_count** | **Z48-CK-3_FPKM** | **Z48-CK-3_count** | **Z48-CL-1_FPKM** | **Z48-CL-1_count** | **Z48-CL-2_FPKM** | **Z48-CL-2_count** | **Z48-CL-3_FPKM** | **Z48-CL-3_count** |
| --- | --- | --- | --- | --- | --- | --- | --- | --- | --- | --- | --- | --- |
| **GhPR1-1** | 0.62 | 32 | 0.67 | 33 | 0.48 | 26 | 0.72 | 48 | 0.52 | 35 | 0.23 | 16 |
| **GhPR1-2** | 0.98 | 56 | 0.91 | 50 | 1.05 | 60 | 1.06 | 79 | 1.14 | 84 | 3.26 | 245 |
| **GhPR1-3** | 0.45 | 17 | 0.44 | 16 | 1.75 | 63 | 0.20 | 10 | 0.24 | 11 | 0.08 | 4 |
| **GhPR1-4** | 0.12 | 9 | 0.50 | 32 | 0.26 | 18 | 0.15 | 14 | 0.07 | 7 | 0.03 | 3 |
| **GhPR1-5** | 0.08 | 7 | 0.39 | 31 | 3.25 | 261 | 0.06 | 7 | 0.03 | 4 | 0.02 | 3 |
| **GhPR1-6** | 11.67 | 639 | 10.29 | 541 | 13.83 | 759 | 2.68 | 192 | 2.82 | 199 | 1 | 73 |
| **GhPR1-7** | 1.58 | 32 | 2.14 | 42 | 2.87 | 58 | 0.16 | 5 | 0.28 | 8 | 0 | 0 |
| **GhPR1-8** | 5.97 | 570 | 6.03 | 554 | 5.92 | 567 | 6.98 | 872 | 9.59 | 1180 | 16.79 | 2120 |
| **GhPR1-9** | 1.03 | 97 | 1.19 | 107 | 0.91 | 86 | 2.49 | 305 | 2.05 | 248 | 0.86 | 107 |
| **GhPR1-10** | 2.89 | 154 | 1.94 | 99 | 3.39 | 181 | 3.64 | 253 | 3.64 | 249 | 5.04 | 354 |
| **GhPR1-11** | 0.46 | 9 | 0.28 | 6 | 0.30 | 6 | 0.07 | 2 | 0.05 | 2 | 0 | 0 |
| **GhPR1-12** | 4.64 | 90 | 5.02 | 94 | 6.44 | 126 | 2.58 | 66 | 2.01 | 51 | 1.95 | 51 |
| **GhPR1-13** | 0.15 | 12 | 0.07 | 6 | 0.12 | 10 | 0.50 | 49 | 0.38 | 37 | 0.92 | 91 |
| **GhPR1-14** | 0.10 | 2 | 0.06 | 2 | 0.09 | 2 | 0 | 0 | 0 | 0 | 0 | 0 |
| **GhPR1-15** | 0.75 | 8 | 0.85 | 9 | 1.01 | 11 | 1.26 | 18 | 0.88 | 13 | 0.81 | 12 |
| **GhPR1-16** | 2.15 | 63 | 1.36 | 38 | 3.06 | 90 | 0.15 | 6 | 0.19 | 7 | 0 | 0 |
| **GhPR1-17** | 0.15 | 14 | 0.30 | 26 | 2.05 | 183 | 0.11 | 13 | 0.22 | 26 | 0.05 | 6 |
| **GhPR1-18** | 1.10 | 9 | 0.60 | 5 | 1.09 | 9 | 3.31 | 35 | 3.02 | 32 | 5.83 | 62 |
| **GhPR1-19** | 0 | 0 | 0.09 | 2 | 0.13 | 2 | 0.30 | 6 | 0.13 | 3 | 0.24 | 5 |
| **GhPR1-20** | 6.34 | 127 | 5.10 | 98 | 7.57 | 152 | 0.58 | 16 | 0.98 | 26 | 0.27 | 8 |
| **GhPR1-21** | 18.51 | 421 | 11.74 | 257 | 15.92 | 363 | 1.89 | 57 | 2.32 | 69 | 0.95 | 29 |
| **GhPR1-22** | 1.17 | 42 | 1.22 | 43 | 1.21 | 44 | 1.29 | 61 | 2.11 | 98 | 3.52 | 168 |
| **GhPR1-23** | 3.28 | 186 | 2.70 | 147 | 3.34 | 190 | 1.98 | 147 | 2 | 146 | 0.53 | 40 |
| **GhPR1-24** | 0.24 | 6 | 0 | 0 | 0 | 0 | 0.08 | 3 | 0.85 | 25 | 1.50 | 44 |
| **GhPR1-25** | 2.66 | 197 | 2.87 | 204 | 1.99 | 148 | 3.66 | 354 | 3.58 | 341 | 2.23 | 218 |
| **GhPR1-26** | 1.10 | 50 | 0.90 | 39 | 0.80 | 36 | 0.34 | 20 | 0.43 | 26 | 0.99 | 0 |
| **GhPR1-27** | 0.10 | 8 | 0.06 | 4 | 0.05 | 4 | 0.04 | 4 | 0 | 0 | 0.04 | 4 |
| **GhPR1-28** | 4.86 | 445 | 6.11 | 538 | 4.56 | 419 | 9.45 | 1130 | 9.47 | 1116 | 7.52 | 909 |
