# Supplementary material
Source: Research Square preprint supplement (doi:10.21203/rs.3.rs-9305286/v1)
Supplement: Supplementary file 5 [file f46dd9cdb74180082c876984.docx]

| **Gene Name** | **Chr ID** | **Protein Length** | **Weight(kds)** | **Theoretical Pl** | **Instability Index** | **Aliphatic Index** | **GRAVY** | **Subcellular localization** |
| --- | --- | --- | --- | --- | --- | --- | --- | --- |
| GaPR1-1 | Chr02 | 527 | 19.08372 | 8.72 | 36.06 | 73.77 | -0.221 | Extracellular space |
| GaPR1-2 | Chr02 | 485 | 17.81399 | 5.6 | 27.74 | 66.58 | -0.3 | Extracellular space |
| GaPR1-3 | Chr02 | 479 | 17.41451 | 5.02 | 33.63 | 74.91 | -0.11 | Extracellular space |
| GaPR1-4 | Chr04 | 500 | 18.72498 | 6.27 | 44.74 | 59.4 | -0.381 | Extracellular space |
| GaPR1-5 | Chr05 | 539 | 20.34337 | 9.87 | 31.5 | 75.2 | -0.525 | Extracellular space |
| GaPR1-6 | Chr06 | 548 | 20.91681 | 8.68 | 53.22 | 72.97 | -0.555 | Extracellular space |
| GaPR1-7 | Chr08 | 503 | 18.88739 | 9.44 | 35.76 | 66.65 | -0.39 | Extracellular space |
| GaPR1-8 | Chr08 | 572 | 22.10011 | 6.09 | 36.19 | 68.79 | -0.391 | Extracellular space |
| GaPR1-9 | Chr08 | 905 | 34.36642 | 8.7 | 57.1 | 60.27 | -0.903 | Extracellular space |
| GaPR1-10 | Chr08 | 2427 | 15.10213 | 5.9 | 41.81 | 88.41 | -0.051 | Extracellular space |
| GaPR1-11 | Chr09 | 554 | 20.09241 | 6.98 | 42.84 | 76.41 | -0.211 | Extracellular space |
| GaPR1-12 | Chr11 | 530 | 18.92658 | 8.68 | 34.12 | 75.51 | -0.063 | Extracellular space |
| GaPR1-13 | Chr13 | 2045 | 75.03966 | 6.9 | 44.32 | 90.35 | -0.147 | Plasm membrane |
| GaPR1-14 | tig00015610 | 1789 | 17.98629 | 6.49 | 22.52 | 67.8 | -0.289 | Extracellular space |
| GbPR1-1 | A05 | 539 | 30.67422 | 8.34 | 60.35 | 62.75 | -0.899 | Extracellular space |
| GbPR1-2 | A05 | 500 | 18.94563 | 8.85 | 33.96 | 75.51 | -0.07 | Extracellular space |
| GbPR1-3 | A08 | 362 | 22.10011 | 6.09 | 36.19 | 68.79 | -0.391 | Extracellular space |
| GbPR1-4 | A08 | 572 | 13.77838 | 9.17 | 44.37 | 46.33 | -0.731 | Extracellular space |
| GbPR1-5 | A08 | 809 | 20.42346 | 10 | 31.98 | 74.13 | -0.602 | Extracellular space |
| GbPR1-6 | A11 | 530 | 18.70796 | 6.5 | 42.49 | 62.35 | -0.391 | Extracellular space |
| GbPR1-7 | A12 | 488 | 17.38839 | 5.78 | 21.87 | 68.64 | -0.222 | Extracellular space |
| GbPR1-8 | D01 | 1016 | 17.59784 | 5.14 | 31.76 | 82.88 | -0.077 | Extracellular space |
| GbPR1-9 | D01 | 1776 | 20.97489 | 8.97 | 51.06 | 70.27 | -0.612 | Extracellular space |
| GbPR1-10 | D01 | 491 | 18.68197 | 6.27 | 46.4 | 58.8 | -0.371 | Extracellular space |
| GbPR1-11 | D03 | 296 | 21.03299 | 9.66 | 52.88 | 65.11 | -0.329 | Extracellular space |
| GbPR1-12 | D04 | 500 | 20.02132 | 6.93 | 41.88 | 75.38 | -0.24 | Extracellular space |
| GbPR1-13 | D05 | 539 | 18.84031 | 9.44 | 32.39 | 67.25 | -0.393 | Plasm membrane |
| GbPR1-14 | D06 | 548 | 16.33884 | 8.55 | 25.62 | 82.46 | -0.173 | Extracellular space |
| GbPR1-15 | D08 | 503 | 17.64388 | 9.11 | 20.28 | 71.67 | -0.335 | Extracellular space |
| GbPR1-16 | D08 | 1037 | 74.54144 | 7.26 | 44.34 | 93.19 | -0.114 | Plasm membrane |
| GbPR1-17 | D08 | 482 | 16.87421 | 10.02 | 28.07 | 75.97 | -0.558 | Extracellular space |
| GbPR1-18 | D09 | 554 | 27.64484 | 5.27 | 32.09 | 72.2 | -0.238 | Extracellular space |
| GbPR1-19 | D12 | 488 | 18.07532 | 5.82 | 26.37 | 65.15 | -0.301 | Extracellular space |
| GbPR1-20 | D13 | 1334 | 45.28959 | 8.78 | 40.39 | 81.69 | -0.121 | Extracellular space |
| GbPR1-21 | D13 | 1817 | 66.46582 | 8.46 | 41.45 | 88.66 | -0.137 | Plasm membrane |
| GbPR1-22 | D13 | 3021 | 10.87122 | 6.68 | 10.57 | 55.71 | -0.444 | Extracellular space |
| GhPR1-1 | A01 | 485 | 17.81597 | 5.6 | 27.62 | 64.78 | -0.33 | Extracellular space |
| GhPR1-2 | A01 | 479 | 17.38444 | 5.02 | 36.15 | 72.45 | -0.145 | Extracellular space |
| GhPR1-3 | A02 | 899 | 19.25401 | 8.88 | 37.65 | 76 | -0.219 | Extracellular space |
| GhPR1-4 | A04 | 488 | 17.58679 | 8.98 | 23.16 | 69.88 | -0.348 | Extracellular space |
| GhPR1-5 | A05 | 500 | 18.68693 | 5.88 | 49.29 | 62.35 | -0.399 | Extracellular space |
| GhPR1-6 | A08 | 1379 | 22.04208 | 6.42 | 36.04 | 68.79 | -0.374 | Extracellular space |
| GhPR1-7 | A08 | 503 | 18.85736 | 9.44 | 34.32 | 67.25 | -0.375 | Extracellular space |
| GhPR1-8 | A08 | 905 | 34.32233 | 8.5 | 57.38 | 60.6 | -0.894 | Extracellular space |
| GhPR1-9 | A08 | 2469 | 15.16222 | 5.37 | 38.91 | 90.51 | -0.025 | Extracellular space |
| GhPR1-10 | A09 | 347 | 12.76721 | 8.8 | 29.91 | 61.13 | -0.364 | Extracellular space |
| GhPR1-11 | A11 | 530 | 18.92658 | 8.68 | 34.12 | 75.51 | -0.063 | Extracellular space |
| GhPR1-12 | A12 | 488 | 17.38839 | 5.78 | 21.87 | 68.64 | -0.222 | Extracellular space |
| GhPR1-13 | A13 | 1883 | 63.29009 | 8.36 | 38.38 | 85.8 | -0.176 | Plasm membrane |
| GhPR1-14 | D01 | 491 | 18.07532 | 5.82 | 26.37 | 65.15 | -0.301 | Extracellular space |
| GhPR1-15 | D01 | 479 | 17.52466 | 5.44 | 31.05 | 74.91 | -0.158 | Extracellular space |
| GhPR1-16 | D03 | 731 | 19.09779 | 8.88 | 36.06 | 73.77 | -0.223 | Extracellular space |
| GhPR1-17 | D04 | 500 | 17.51461 | 6.8 | 50.25 | 54.49 | -0.481 | Extracellular space |
| GhPR1-18 | D05 | 539 | 20.42045 | 10.2 | 33.05 | 73.58 | -0.627 | Extracellular space |
| GhPR1-19 | D06 | 548 | 20.97588 | 8.83 | 50.75 | 70.27 | -0.612 | Extracellular space |
| GhPR1-20 | D08 | 503 | 18.84031 | 9.44 | 32.39 | 67.25 | -0.393 | Plasm membrane |
| GhPR1-21 | D08 | 572 | 22.08412 | 6.42 | 33.57 | 68.26 | -0.405 | Extracellular space |
| GhPR1-22 | D08 | 905 | 34.40926 | 7.14 | 57.92 | 59.6 | -0.919 | Extracellular space |
| GhPR1-23 | D08 | 482 | 17.63187 | 5.14 | 35 | 81.06 | -0.09 | Extracellular space |
| GhPR1-24 | D09 | 554 | 20.02132 | 6.93 | 41.88 | 75.38 | -0.24 | Extracellular space |
| GhPR1-25 | D11 | 530 | 18.93366 | 8.85 | 35.81 | 77.73 | -0.054 | Extracellular space |
| GhPR1-26 | D12 | 488 | 17.54179 | 8.84 | 21.5 | 72.84 | -0.272 | Extracellular space |
| GhPR1-27 | D13 | 1817 | 64.07696 | 8.49 | 41.69 | 86.83 | -0.19 | Extracellular space |
| GhPR1-28 | D13 | 2307 | 74.86679 | 7.51 | 43.78 | 91.64 | -0.11 | Plasm membrane |
| GrPR1-1 | Chr02 | 1018 | 21.45654 | 9.61 | 50.89 | 64.95 | -0.352 | Extracellular space |
| GrPR1-2 | Chr02 | 805 | 18.14437 | 6.04 | 27.07 | 65.15 | -0.342 | Extracellular space |
| GrPR1-3 | Chr02 | 513 | 10.64301 | 9.05 | 30.42 | 86.53 | -0.11 | Extracellular space |
| GrPR1-4 | Chr02 | 610 | 17.48459 | 5.44 | 29.9 | 72.45 | -0.187 | Extracellular space |
| GrPR1-5 | Chr03 | 734 | 16.29061 | 8.88 | 22.71 | 77.07 | -0.208 | Extracellular space |
| GrPR1-6 | Chr04 | 1079 | 18.78523 | 9.32 | 30.44 | 67.25 | -0.37 | Plasm membrane |
| GrPR1-7 | Chr04 | 1351 | 22.05606 | 6.09 | 34.18 | 68.26 | -0.4 | Extracellular space |
| GrPR1-8 | Chr04 | 1440 | 34.3462 | 7.14 | 55.61 | 59.93 | -0.908 | Extracellular space |
| GrPR1-9 | Chr04 | 510 | 18.56144 | 3.93 | 47.98 | 77.59 | -0.232 | Organelle membrane |
| GrPR1-10 | Chr04 | 482 | 17.59382 | 4.86 | 36.21 | 81.69 | -0.076 | Extracellular space |
| GrPR1-11 | Chr06 | 554 | 20.03033 | 6.98 | 45.35 | 75.38 | -0.238 | Extracellular space |
| GrPR1-12 | Chr07 | 752 | 18.90664 | 8.99 | 31.02 | 75.51 | -0.055 | Extracellular space |
| GrPR1-13 | Chr08 | 517 | 12.58503 | 8.55 | 16.56 | 61.91 | -0.449 | Extracellular space |
| GrPR1-14 | Chr08 | 686 | 17.49065 | 8.15 | 22.02 | 75.25 | -0.22 | Extracellular space |
| GrPR1-15 | Chr09 | 881 | 20.42139 | 10.1 | 31.23 | 73.58 | -0.625 | Extracellular space |
| GrPR1-16 | Chr10 | 877 | 20.94688 | 8.83 | 48.75 | 71.87 | -0.584 | Extracellular space |
| GrPR1-17 | Chr12 | 500 | 18.64796 | 6.27 | 48.36 | 59.4 | -0.361 | Extracellular space |
| GrPR1-18 | Chr13 | 1826 | 43.19302 | 8.53 | 41.41 | 81.4 | -0.155 | Plasm membrane |
